# 1 **Population structure limits parallel evolution**

2 Bohao Fang<sup>1\*</sup>, Petri Kemppainen<sup>1\*</sup>, Paolo Momigliano<sup>1\*</sup> & Juha Merilä<sup>1,2</sup>

3 <sup>1</sup>*Ecological Genetics Research Unit, Organismal and Evolutionary Biology Research*  
4 *Programme, Faculty of Biological and Environmental Sciences, FI-00014 University of*  
5 *Helsinki, Finland.*

6 <sup>2</sup>*Research Division of Ecology and Biodiversity, Faculty of Science, Kadoorie Building, The*  
7 *University of Hong Kong, Hong Kong SAR*

8

9 Running head: *Comparative population genomics of local adaptation*

10 \*These authors contributed equally to this work

11 Correspondence to BF (bohao.fang@helsinki.fi)

12

13 **Abstract**

14 Population genetic theory predicts that small effective population sizes ( $N_e$ ) and restricted  
15 gene flow limit the potential for local adaptation. In particular, the probability of evolving  
16 similar phenotypes based on shared genetic mechanisms (i.e. parallel evolution), is expected  
17 to be reduced. We tested these predictions in a comparative genomic study of two  
18 ecologically similar and geographically co-distributed stickleback species (*viz.* *Gasterosteus*  
19 *aculeatus* and *Pungitius pungitius*). We found that *P. pungitius* harbours less genetic diversity  
20 and exhibits higher levels of genetic differentiation and isolation-by-distance than *G.*  
21 *aculeatus*. Conversely, *G. aculeatus* exhibits a stronger degree of genetic parallelism across  
22 freshwater populations than *P. pungitius*: 2996 vs. 379 SNPs located within 26 vs nine  
23 genomic regions show evidence of selection in multiple freshwater populations of *G.*  
24 *aculeatus* and *P. pungitius*, respectively. Most regions involved in parallel evolution in *G.*  
25 *aculeatus* showed increased levels of divergence, suggestive of selection on ancient  
26 haplotypes. In contrast, regions involved in freshwater adaptation in *P. pungitius* were  
27 younger, and often associated with reduced diversity. In accordance with theory, the results  
28 suggest that connectivity and genetic drift play crucial roles in determining the levels and  
29 geographic distribution of standing genetic variation, providing evidence that population  
30 subdivision limits local adaptation and therefore also the likelihood of parallel evolution.

31 **Keywords:** adaptation, genetic diversity, isolation by distance, population differentiation,  
32 parallel evolution

33

## 34 **Introduction**

35 Parallel evolution – defined here as the evolution of similar phenotypes in multiple  
36 independently colonised populations via selection on alleles that are identical by descent – is  
37 considered to be strong evidence for the role of natural selection in evolutionary change  
38 (Schluter et al. 2004). Adaptation from standing genetic variation (SGV) is thought to be the  
39 dominant route to parallel evolution among recently diverged populations (Conte et al. 2012;  
40 Ord & Summers 2015). Since genetic drift erodes SGV and barriers to gene flow can prevent  
41 beneficial alleles from reaching populations adapting to specific local habitats (Barrett &  
42 Schluter 2008; Feulner et al. 2013; Lenormand 2002), both the effective population size ( $N_e$ )  
43 of the ancestral population (MacPherson & Nuismer 2017; Thompson et al. 2019) and gene  
44 flow (Bailey et al. 2017; Lee & Coop 2017; Ralph & Coop 2015) are expected to play key  
45 roles in determining the probability of parallel evolution. Both factors are expected to affect  
46 the heterogeneity in the geographic distribution of SGV across the distribution ranges of  
47 species. However, despite increasing interest to understand the drivers of parallel evolution  
48 over the past decade (e.g., Arendt & Reznick 2008; Barghi et al. 2019; Bolnick et al. 2018;  
49 Conte et al. 2012; Elmer et al. 2014; Elmer & Meyer 2011; Rosenblum et al. 2014; Stern  
50 2013; Stuart et al. 2017), little effort has been placed to investigate the role of geographic  
51 heterogeneity in SGV (but see: Fang et al. 2020a; Kempainen et al. 2021; Lee & Coop  
52 2017). One way to test whether heterogeneity in pools of SGV determines the probability of  
53 parallel evolutionary responses is to investigate genetic structure and local adaptation in pairs  
54 of co-distributed and ecologically similar species that differ in their dispersal potential and  
55 population size, and hence, in the degree of heterogeneity of their pools of SGV.

56 The three-spined stickleback (*Gasterosteus aculeatus*) is an iconic model species used to  
57 study genetic parallelism. A multitude of studies has shown that the independent colonization

58 of freshwater habitats across the global distribution range of this species has led to substantial,  
59 and often (but not always) parallel marine-freshwater associated genetic differentiation  
60 (Colosimo et al. 2005; DeFaveri et al. 2012; DeFaveri et al. 2011; Fang et al. 2020a;  
61 Hohenlohe et al. 2010; Hohenlohe & Magalhaes 2019; Jones et al. 2012). Despite the near  
62 circumpolar distribution of *Gasterosteus* sticklebacks, only three taxonomically valid species  
63 have been recognized in this genus (*viz.* *G. aculeatus*, *G. wheatlandi*, *G. japonicus*;  
64 Eschmeyer et al. 2017). In contrast, the circumpolarly distributed stickleback fishes in the  
65 genus *Pungitius* harbour at least eight taxonomically valid species (Eschmeyer et al. 2017;  
66 Guo et al. 2019; Takahashi et al. 2016), and there is evidence that the level of genetic  
67 differentiation among local populations in this genus greatly exceeds that seen among local  
68 populations of *Gasterosteus* (DeFaveri et al. 2012; Kemppainen et al. 2021; Merilä 2013; but  
69 see: Raeymaekers et al. 2017). Thus, comparative genetic studies of these two co-distributed  
70 species can provide an opportunity to gain novel insight into how differences in population  
71 structure, and thus in the distribution of SGV, may translate into differences in the probability  
72 of genetic parallelism. However, apart from two geographically restricted studies (DeFaveri et  
73 al. 2012; Raeymaekers et al. 2017), there has been no attempt to study and compare the levels  
74 of genetic variability and divergence among *Gasterosteus* and *Pungitius* taxa in a quantitative  
75 manner in a broad geographic context.

76 There is generally a greater abundance of three- than nine-spined sticklebacks in the sea (e.g.,  
77 Cowen et al. 1991; Jurvelius et al. 1996; Ojaveer et al. 2003; Quinn & Light 1989) which is  
78 likely to limit gene flow and contribute to substantial genetic isolation by distance (IBD) in  
79 marine nine-spined sticklebacks. Consistent with this, earlier work suggests that the pool of  
80 SGV is indeed reduced and more fragmented in nine- compared to three-spined sticklebacks  
81 (DeFaveri et al. 2012; Kemppainen et al. 2021; Merilä 2014). To gain a holistic view of  
82 factors that influence such differences in SGV, using comprehensive geographic sampling and

83 high-density population genomic data, we first re-assess the differences in both phylogenetic  
84 histories and population demographic parameters between these two species. We then  
85 formulate and test the hypothesis that due to a higher geographic heterogeneity in SGV in  
86 nine-spined sticklebacks, this species will show a lower prevalence of parallel evolution in  
87 response to freshwater colonisation than the three-spined stickleback.

88

## 89 **Materials and methods**

### 90 **The study species**

91 The two study species are ecologically very similar and are frequently syntopic in both marine  
92 and freshwater habitats (e.g., Copp & Kovac 2003; DeFaveri et al. 2012; Ojaveer et al. 2003;  
93 Raeymaekers et al. 2017). However, there is a tendency for the three-spined stickleback to be  
94 more common in marine habitats, and for the nine-spined stickleback to be more common in  
95 freshwater habitats (Wootton 1976; Wootton 1984). Both species are small (typically < 100  
96 mm), with similar lifespans (Baker 1994; DeFaveri & Merilä 2013; DeFaveri et al. 2014) and  
97 breeding habits (Wootton 1976; Wootton 1984), and exhibit male parental care; males build  
98 and attend nests in which multiple females can lay their eggs (Wootton 1976; Wootton 1984).  
99 Females of both species can lay single or multiple clutches of *ca.* 100-500 eggs per breeding  
100 season (Baker 1994; Heins & Baker 2003; Herczeg et al. 2010; Wootton 1976; Wootton  
101 1984). Hence, we do not expect a large variation in levels of SGV between the two species  
102 due to differences in life-history traits (cf. Ellegren & Galtier 2016; Romiguier et al. 2014).

### 103 **Sample collection and sequencing**

104 The data set is composed of 166 (47 marine and 119 freshwater) three-spined stickleback and  
105 181 (48 marine and 133 freshwater) nine-spined stickleback individuals. The 166 three-spined  
106 stickleback samples were the same as used in Fang et al. 2020a). Data for 75 nine-spined  
107 stickleback samples were retrieved from an earlier Restriction Site Associated DNA (RAD)  
108 sequencing study (Guo et al. 2019) and a whole-genome re-sequencing (WGRS) study (Feng  
109 et al. 2020). New samples of nine-spined sticklebacks were sequenced specifically for this  
110 study, including 23 samples using RAD sequencing (protocol following Guo et al. 2019,  
111 using the PstI enzyme) and 83 samples using WGRS at 10X coverage (protocol following  
112 Feng et al. 2020). In total, 63 populations (26 marine and 37 freshwater; sample sizes: 1–10)  
113 of three-spined stickleback and 36 populations (7 marine and 29 freshwater populations;  
114 sample sizes: 1–20) of nine-spined stickleback were included in this study. The sampling sites  
115 are shown in Fig. 1a and detailed sample information (population acronyms, sample sizes,  
116 lineages, sampling site coordinates, sequencing information etc.) are given in Supplementary  
117 Table 1.

118 According to the known phylogenetic relationships within each species, the three-spined  
119 stickleback samples were assigned to seven lineages: Eastern Pacific (EP), Western Pacific  
120 (WP), Western Atlantic (WA), White and Barents Seas (WB), North Sea & British Isles (NS),  
121 Baltic Sea (BS) and Norwegian Sea (NOR) (Fang et al. 2018); and the nine-spined  
122 stickleback samples were assigned to six lineages; Western Europe (WL), Eastern Europe  
123 (EL), Baltic & North Seas (BN; this lineage has been formed through admixture between the  
124 Western European [WL] and Eastern European [EL] lineages; Feng et al. 2020; Guo et al.  
125 2019; Teacher et al. 2011), Far East (FE), North America (NA) and Alaska (ALA).

126 The new stickleback samples were collected during the local breeding seasons with seine nets  
127 and minnow traps. After euthanizing the fish with an overdose of MS-222, whole fish or fin

128 clips were preserved in ethanol for DNA-extractions using the salting-out method (Sunnucks  
129 & Hales 1996). The sample collection in Finland was conducted with personal fishing  
130 licences and permissions from the landowners according to the Finnish Fishing Law (5§  
131 27.5.2011/600). In other countries, the sampling was performed under respective national  
132 licenses granted to the sample-providers. The study does not involve animal experiments  
133 according to the Finnish National Animal Experiment Board (#STH379A and #STH223A).  
134 For the newly sequenced nine-spined stickleback samples, the RAD-sequencing data and the  
135 WGRS data were obtained with the protocols given in Guo et al. 2019) and Feng et al. 2020),  
136 respectively.

### 137 **Genotype likelihood estimation**

138 The same bioinformatics pipelines were applied to both species. For each species, all RAD  
139 and WGRS sequences were mapped to their respective reference genomes with BWA mem  
140 v.0.7.17 (Li & Durbin 2010). The reference genome of the three-spined stickleback was  
141 retrieved from the Ensembl database (release-92; Yates et al. 2020) and that of the nine-  
142 spined stickleback from (Varadharajan et al. 2019; ver. 6). Genotype likelihoods were  
143 estimated from the mapped reads using ANGSD v.0.93 (Korneliussen et al. 2014) with the  
144 same parameter settings for both species. Quality filtering parameters are explained in detail  
145 in the Supplementary Method 1. The raw output of genotype likelihoods from the 166 three-  
146 spined sticklebacks comprised 2,511,922 SNPs and those of the 181 nine-spined sticklebacks  
147 7,938,802 SNPs. The difference in SNP numbers between species partly reflects the larger  
148 proportion of WGS samples in the latter species (80.1%) than in the former species (22.9%).

### 149 **Genetic diversity and differentiation**

150 Genetic diversity within populations was estimated by computing population nucleotide  
151 diversity ( $\pi$ , Nei & Li 1979) and Watterson's theta ( $\theta = 4N_e\mu$ , where  $N_e$  is effective population  
152 size and  $\mu$  the mutation rate, Watterson 1975) as well as individual heterozygosity ( $H$ , the  
153 proportion of heterozygous sites within an individual genome) with ANGSD and custom R-  
154 scripts (Supplementary Method 2). Since some of the sampled populations are known to be  
155 admixed (Feng et al. 2020; Guo et al. 2019; Supplementary Method 2), their genetic diversity  
156 was expected to be elevated. We report the results both when excluding and including the  
157 admixed nine-spined stickleback populations. In each species, the allelic differentiation  $F_{ST}$   
158 (Weir & Cockerham 1984) was calculated over all samples, within marine and within  
159 freshwater ecotypes (global  $F_{ST}$  over all loci), and between populations (pairwise  $F_{ST}$ ). To do  
160 so, we used a subset of high-quality genotypes to estimate global  $F_{ST}$  for each ecotype and the  
161 pairwise  $F_{ST}$  between all populations with the R packages *hierfstat* (Goudet 2005) and  
162 *StAMPP* (Pembleton et al. 2013), respectively. Details of the methods used to estimate genetic  
163 diversity and differentiation are specified in the Supplementary Method 2.

164 The levels of genetic diversity ( $H$ ,  $\pi$  and  $\theta$ ) between the two species were compared by fitting  
165 generalized linear mixed-effects models (GLMMs) in R using the packages *lme4* (Bates et al.  
166 2014) and *Car* (Fox et al. 2012). The models treat species, habitat (Freshwater, Marine) and  
167 their interaction as fixed effects. The geographic region was set as a random effect to account  
168 for non-independence between populations across regions. Non-significant interactions were  
169 deleted from the final models. To test differences in global  $F_{ST}$  between species and habitats,  
170 we performed bootstrapping based on 10,000 resampled datasets in which each resample  
171 consisted of 1/3 of the markers and 1/3 of the samples to obtain the 95% confidence intervals.

## 172 **Isolation-by-distance**



173 Tests for isolation-by-distance (IBD) were performed by regressing pairwise genetic distances  
174 (linearized  $F_{ST} = F_{ST} / [1 - F_{ST}]$ ; Slatkin 1995) against pairwise geographic distances between  
175 populations. Our sampling of the nine-spined sticklebacks from the Eastern Pacific region  
176 was very thin: only two freshwater and no marine populations were sampled. Therefore, to  
177 characterize IBD for different ecotypes (marine and freshwater populations), we performed  
178 the IBD tests on the European populations (see Supplementary Fig. 1d for sampling map),  
179 where both ecotypes for both species were available. Geographic distances were measured  
180 between marine populations based on the pairwise least-cost geographic distances across  
181 marine environments using the R Package *Marmap* (Pante & Simon-Bouhet 2013), and  
182 between freshwater populations based on world geodetic system with the R package *raster*  
183 (Hijmans & van Etten 2014). To test if the IBD relationships differed between the two  
184 stickleback species and habitats, the IBD regressions were fitted with maximum-likelihood  
185 population effects (MLPE) models to account for the non-independence of pairwise distances  
186 (Clarke et al. 2002) and slopes of the IBD regressions for both species were compared. The  
187 MLPE analyses were performed using the R packages *corMLPE* (Clarke et al. 2002) and *nlme*  
188 (Pinheiro et al. 2017).

189 The White Sea marine population of the nine-spined stickleback (RUS-LEV) has a close  
190 phylogenetic relationship with the marine populations of the Baltic Sea, since the latter  
191 originated from a post-glacial invasion from the White Sea over an area today occupied by  
192 land (Guo et al. 2019; Shikano et al. 2010a) this study [Fig. 3]). Therefore, there is a clear  
193 rationale to expect RUS-LEV to be an outlier in IBD analysis. We thus performed IBD  
194 analyses excluding the population RUS-LEV but we also report the results when including it  
195 in Supplementary Information 1.

## 196 **Comparative phylogenomic analyses**

197 There is evidence to suggest that the probability of genetic parallelism decreases with  
198 increasing divergence time between taxa (Conte et al. 2012; Ord & Summers 2015). To assess  
199 differences in divergence times among populations of the two species, time-calibrated  
200 phylogenetic trees were constructed using genome-wide SNPs based on the multispecies  
201 coalescent model with the program SNAPP (Bouckaert & Bryant 2012; Chifman & Kubatko  
202 2014).

203 For these analyses, we selected 16 paired sampling locations from where samples of both  
204 species were available, representing all major biogeographic regions within the two species'  
205 distribution ranges (Fig. 3). SNAPP analyses were performed using filtered datasets of 12,022  
206 SNPs for three- and 13,079 SNPs for nine-spined sticklebacks (bi-allelic SNPs > 10 kb apart,  
207 with no missing data, and posterior probability > 0.95%), following the protocols of Stange et  
208 al. 2018 and Fang et al. 2020b. The time calibrations were conducted using the divergence  
209 time estimates derived from Guo et al. 2019 and Fang et al. 2020b for nine- and three-spined  
210 sticklebacks, respectively. Detailed methods of SNP filtering and phylogenetic analyses are  
211 specified in the Supplementary Method 3.

## 212 **Comparative analyses of genetic parallelism**

213 The degree of genetic parallelism in response to freshwater colonisation in three- and nine-  
214 spined sticklebacks was assessed in two steps. First, Linkage Disequilibrium Network  
215 Analyses (LDna; Fang et al. 2020a; Kemppainen et al. 2015; Li et al. 2018) was used to  
216 partition data into correlated sets of loci (LD-clusters), followed by linear mixed models  
217 (LMM) testing for associations between PC-coordinates based on loci from the LD-clusters  
218 and ecotype (treated as a binary trait) while controlling for *p*-value inflation due to relatedness  
219 and other confounding factors. For these analyses, only samples from the Atlantic region were

220 used, and the data sets were normalised such that the same number of polymorphic loci were  
221 analysed for both species after accounting for differences in sequencing coverage and genetic  
222 diversity (see Supplementary Method 4). Ultimately, 882,125 and 1,355,325 SNPs (in the  
223 form of genotype likelihoods) were used in the downstream comparative LDna analyses in  
224 three- and nine-spined sticklebacks, respectively.

### 225 *Complexity reduction using LDna analyses*

226 Since LDna relies on pairwise LD-estimates among all loci, it is not feasible to consider all  
227 pairwise comparisons at once for large data sets. Instead, we adopted a nested approach,  
228 starting with LDna within windows within chromosomes (LDna-1, *sensu* Li et al. 2018;  
229 Supplementary Method 4), followed by LDna within chromosomes (LDna-2) and finally  
230 LDna for genome wide SNPs (LDna-3) as described in Fang et al. 2020a, with some  
231 modifications (an overview of this approach is given in Supplementary Fig. 2 and further  
232 details are given in Supplementary Method 4). First, LD-clusters were defined by a single  
233 parameter, the minimum number of edges in the cluster ( $|E|_{min}$ ), rendering the previously used  
234  $\lambda_{lim}$  parameter (that determines how different LD-signals are between different clusters)  
235 obsolete.

236 Second, instead of using one SNP (rSNP) to represent a cluster in the subsequent LDna-step,  
237 the final LDna-3 was based on a correlation matrix of  $r^2$  between PC1-coordinates (based on  
238 genotype likelihoods from all loci from a given LD-cluster; PCAngsd) (Meisner &  
239 Albrechtsen 2018) between all pairs of LD-clusters entering LDna-3 analyses. The first PC  
240 typically explains  $\gg 90\%$  of the variation in each LD-cluster and in Supporting Information 5  
241 we demonstrate that these coordinates can be regarded as “synthetic multi-locus alleles”  
242 (SMLAs). Third, all LDna-1 clusters with more than  $SNP_{min}$  number of loci and that were not

243 part of any LDna-2 cluster were also included in the final LDna-3 analyses. Fourth, LDna-3  
244 clusters were determined by the parameter  $Cor_{th}$ , which specifies the weakest link ( $r_2$ -value)  
245 in a cluster that is allowed between LDna-1 and LDna-2 clusters entering LDna-3. As such,  
246 decreasing parameter values for  $|E|_{min}$ ,  $SNP_{min}$  and  $Cor_{th}$  lead to many smaller clusters with  
247 few but highly correlated loci and vice versa.

248 There is a trade-off between *i*) “under clustering” (i.e. analysing many clusters that in reality  
249 reflect the same evolutionary phenomena leading to overly conservative corrections for  
250 multiple testing), and *ii*) “over clustering” (i.e. analysing fewer and larger clusters but each  
251 with sets of less correlated loci). While the latter leads to less conservative corrections for  
252 multiple testing (higher power), it likely also leads to weaker associations between the  
253 SMLAs and ecotype. Importantly, the parameter settings that maximises the power to detect a  
254 particular genomic region of interest will depend on both the data set (numbers of loci and the  
255 underlying LD-structure) and the genomic region in question. Here we solved this problem by  
256 testing a range of parameter settings for  $|E|_{min}$  [10,20,40],  $SNP_{min}$  [10,20,40] and  $Cor_{th}$   
257 [0.8,0.7,0.6,0.5] for both data sets. All LD-values were estimated by *ngsLD* (Fox et al. 2019)  
258 based on genotype likelihoods. Further details are given in Supplementary Method 4 and  
259 below.

#### 260 *Linear Mixed model analysis for testing associations between LD-clusters and ecotype*

261 We used linear mixed models (LMM) to test for associations between ecotype and the genetic  
262 variation explained by loci in LD-clusters by regressing the SMLAs against ecotype treated as  
263 a binary trait [0,1]. Using LMM to test associations between genotype and phenotype has  
264 previously been shown to be analogous to using permutation to test for allele frequency  
265 difference between two groups (Kemppainen et al. 2017), with the major benefit of LMM’s

266 being computational speed and the ability to account for confounding factors such as  
267 relatedness. When not accounting for any potential confounding factors, the LMM-approach  
268 used here produces test statistics that are highly correlated with both  $F_{ST}$  and the cluster  
269 separation score (CSS; Supporting Method 5; Supplementary Fig. 3), two commonly used  
270 metrics to detect genomic regions associated with parallel evolution in three-spined  
271 sticklebacks (Fang et al. 2020a; Jones et al. 2012; Kingman et al. 2020). We used a modified  
272 version of the restricted maximum likelihood (REML)-based method EMMA (Efficient  
273 Mixed-Model Association eXpedited; Kang et al. 2010; Li et al. 2018) that allowed us to test  
274 for associations between SMLAs (rather than a single bi-allelic SNP at a time) from LD-  
275 clusters and ecotype (Supporting Method 6).

276 Two approaches to control for multiple testing were used: permutation (Li et al. 2018)  
277 (Supporting Method 7) and the “*HS*” method aka false discovery rate “*fdr*” (Benjamini &  
278 Hochberg 1995). In addition, two methods to control for  $p$ -value inflation caused by  
279 relatedness were used: including a relatedness matrix  $A$  as a random effect (Kang et al. 2010)  
280 and genomic control (Price et al. 2010). Whenever *fdr* was used to control for multiplicity, we  
281 also iteratively estimated  $p$ -value inflation as the linear slope  $\lambda$  between observed and  
282 expected (under the null-hypothesis)  $-\log_{10}(P)$  values before and after removing significant  
283 LD-clusters from the data (the medians from all orthogonal combinations of  $|E|_{min}$ ,  $SNP_{min}$   
284 and  $Cor_{th}$  were used). The reason for this was the exceptionally high proportion of the genome  
285 involved in parallel marine-freshwater differentiation that would have led to an  
286 overestimation of  $\lambda$ , especially in the three-spined stickleback (iterations stopped when no  
287 more or no less significant genomic regions were found compared to the previous iteration).  
288 Whenever  $p$ -value inflation was present ( $\lambda > 1$ ) all observed  $-\log_{10}(P)$  were divided by  $\lambda$  (prior  
289 to *fdr*), thus ensuring that no residual  $p$ -value inflation would exist in the data, also known as

290 genomic control (GC; Price et al. 2010). For instance,  $\lambda=2$  (high  $p$ -value inflation) means that  
291 a test with  $-\log_{10}(P)=10^{-2}$  after GC -correction is no longer significant ( $10^{-2}/\lambda=0.1$ ). Note that  
292 GC was seldom necessary when relatedness was accounted for and GC is not possible when  
293 permutation is used to control for multiplicity (Li et al. 2018).

294 All association analyses were corrected for  $p$ -value inflation and multiplicity using four  
295 approaches, *i*) including relatedness as a random effect and using *fdr* (“A+fdr”), *ii*) including  
296 relatedness as a random effect and controlling for multiplicity by permutation (“A+perm”),  
297 *iii*) ignoring relatedness and instead using GC to control  $p$ -value inflation, followed by *fdr*  
298 (“GC+fdr”) and *iv*) not including relatedness as a random effect but controlling for  
299 multiplicity using permutation (“perm”; with no possibility for GC).

300 Due to the two highly divergent lineages of nine-spined sticklebacks in the Atlantic (with  
301 some individuals being a result of admixture between them), we included lineage (WL, EL or  
302 ADMIXED) as a co-factor in the analyses for this species. This greatly reduced initial  $p$ -value  
303 inflation that otherwise would have caused many false positives or significantly reduced  
304 power to detect true significant associations following GC.

#### 305 *Assessing sensitivity to of association analyses to parameter settings*

306 With three parameters for defining LD-clusters ( $|E|_{min}$ ,  $SNP_{min}$  and  $Cor_{th}$ ) and four methods to  
307 correct for multiplicity and  $p$ -value inflation, the three- and nine-spined stickleback data sets  
308 were subjected to a total of 180 tests each. It is important to note, however, that all tests are  
309 applied to exactly the same data sets (i.e. tests within species are per definition not  
310 independent), such that the cumulative number of significant genomic regions found is  
311 quickly expected to reach an asymptote as more parameter combinations are tested, as shown  
312 in Supplementary Figure 4.

313 A genomic region was considered significant when at least ten unique loci from clusters  
314 significant at  $\alpha=0.05$  (after corrections) were also physically clustered in the genome as  
315 determined by single linkage clustering with a distance threshold of 500kb. All significant  
316 clusters from any of the 180 parameter/correction method combinations were included but  
317 most loci were found in LD-clusters in multiple such combinations. Based on this, we  
318 calculated a consistency score  $C$  for each putative outlier region, denoting the proportion of  
319 tests where a given genomic region was found significant, with  $C=1$  indicating that a given  
320 region was significant in all 180 tests. Conversely, low  $C$ -scores are expected for outlier  
321 regions that are only detected in a restricted set of parameter/correction combinations. Note,  
322 however, that regions with low  $C$ -scores do not necessarily imply small effect sizes, although  
323 they can be correlated. Our wide range of parameter combinations was necessary to minimise  
324 the dependence between parameter values and the number of outlier regions detected in three-  
325 and nine-spined sticklebacks, despite vastly different levels of population structuring and  
326 potentially fundamentally different mechanisms underlying marine-freshwater parallelism.  
327 We deemed outlier regions with  $C<0.05$  to be too sensitive to parameter settings to be  
328 considered further in downstream analyses (Supplementary Fig. 4).

### 329 *Regional parallelism*

330 We also performed EMMAX analyses separately for the geographic regions with large  
331 sample sizes of freshwater individuals for both species: Baltic Sea (18,13), North Sea (20,23),  
332 Norwegian Sea (21,23) and White & Barents Seas (31,38), with numbers in brackets  
333 indicating sample sizes for three- and nine-spined sticklebacks, respectively. The  
334 corresponding marine samples sizes were more variable for both species and were lacking  
335 altogether from the Norwegian Sea region for the nine-spined sticklebacks. However, for any  
336 genomic region associated with marine-freshwater parallelism, the expectation is that

337 freshwater adapted alleles/haplotypes are found in high frequency in the freshwater  
338 populations where they are locally adapted. Conversely, in marine populations, we expect the  
339 low frequency of these alleles/haplotypes, regardless of geographic location (in contrast to  
340 neutral loci). Thus, in order to analyse and compare regional parallelism for both species  
341 fairly, we pooled all marine samples and contrasted them against freshwater samples from one  
342 of the four geographic regions at a time. These analyses were performed on SMLAs based on  
343 all unique loci from significant LD-clusters that mapped to each significant genomic region  
344 identified above. Since the power to detect significant associations depends on the data set,  
345 we only compared correlation coefficients as proxies for effect sizes, both when assuming all  
346 individuals are unrelated ( $cor_{unrl}$ ) and when including  $A$  as a random effect ( $cor_A$ ). This  
347 allowed us to assess which geographic regions contributed, and how much, for the overall  
348 marine-freshwater differentiation for each significant genomic region.

#### 349 *Divergence times and parallel evolution*

350 Since genetic parallelism is expected to be a negative function of time since divergence (e.g.,  
351 Conte et al. 2012), we further explored the correlation between divergence time and the level  
352 of genetic parallelism using seven freshwater population pairs from Europe (shown in  
353 Supplementary Fig. 5). In each species, we first extracted the divergence times (in Mya)  
354 between pairwise intra-specific populations based on the maximum-clade-credibility  
355 summary tree, using the R-package *ape* (Paradis et al. 2004). The level of genetic parallelism  
356 for each pair of freshwater-freshwater populations was estimated by counting the proportion  
357 (relative to the entire data set) of marine-freshwater associated LD-cluster ( $-\log_{10}(p) > 2$ ) loci  
358 that grouped the two freshwater populations in the PCA (individuals from both freshwater  
359 populations were found in the in-group) for a given LD-cluster. Finally, the matrixes of



360 pairwise intra-specific divergence times and levels of genetic parallelism were fitted using  
361 MLPE model similar to the IBD analyses (described above).

362 Since processes that govern diversity levels within genomes (background selection, mutation  
363 rate and recombination rate variation) are conserved between closely related populations (and  
364 species), different measures of diversity are correlated across the genomes of closely related  
365 populations (Dutoit et al. 2017). Here we take advantage of this correlation to detect whether  
366 outlier genomic regions have more ancient origins than neutral regions by testing whether  
367 genomic regions under selection show excess absolute divergence ( $d_{XY}$ , Nei 1987) relative to  
368 the rest of the genome ( $\Delta d_{XY}$ ) as detailed in Supplementary Method 8.

369

## 370 **Results**

### 371 *Genetic variation within populations*

372 There were significant differences in levels of genetic diversity between the two species and  
373 habitats. Average heterozygosity ( $H$ ) was significantly higher in three-spined than in nine-  
374 spined sticklebacks (GLMM:  $F_{1,258.85}=91.33$ ,  $P<0.001$ ; Fig. 1e). Marine populations  
375 harboured higher heterozygosity than freshwater populations in both species (GLMM:  
376  $F_{1,257.14}=25.70$ ,  $P<0.001$ ; Fig. 1e). Both  $\pi$  and  $\theta$  were also higher in the three- than in the nine-  
377 spined stickleback populations ( $\pi$ : GLMM,  $F_{1,58.91}=10.34$ ,  $P=0.002$ , Fig. 1f;  $\theta$ : GLMM,  
378  $F_{1,58.98}=12.48$ ,  $P<0.001$ , Supplementary Fig. 6a), and higher in marine populations than in  
379 freshwater populations ( $\pi$ : GLMM,  $F_{1,58.98}=12.49$ ,  $P<0.001$ , Fig. 1f,g;  $\theta$ : GLMM,  
380  $F_{1,58.61}=7.25$ ,  $P<0.01$ , Supplementary Fig. 6a). Species\*habitat interactions were not  
381 significant in any of the analyses.

382 When incorporating nine-spined stickleback populations showing strong signatures of  
383 admixture (see Materials and methods) in the analyses, the differences in genetic diversity ( $H$ ,  
384  $\pi$  and  $\theta$ ) between habitats were still significant ( $H$ : GLMM:  $F_{1,320.45}=54.59$ ,  $P<0.001$ ;  $\pi$ :  
385 GLMM,  $F_{1,70.09}=9.24$ ,  $P=0.003$ ;  $\theta$ : GLMM,  $F_{1,69.93}=8.21$ ,  $P=0.005$ ; Supplementary Fig. 6b-d),  
386 but those between species were no longer significant (Supplementary Fig. 6b-d). This  
387 indicates that admixture has had a significant positive effect on genetic diversity in the  
388 admixed nine-spined stickleback populations. Indeed, admixed populations have significantly  
389 higher heterozygosity than non-admixed populations (GLMM,  $F_{1,320.02}=75.82$ ,  $P < 0.001$ ;  
390 Supplementary Fig. 6e).

### 391 *Genetic differentiation among populations*

392 The degree of genetic differentiation among nine-spined stickleback populations was  
393 significantly higher (global  $F_{ST} = 0.419$ , 95% CI: 0.414-0.424; Fig. 1d) than that of three-  
394 spined stickleback populations (global  $F_{ST} = 0.198$ ; 95% CI: 0.194-0.201; Fig. 1d). This was  
395 true also when only considering populations from the same genetic clades in nine-spined  
396 sticklebacks (Supplementary Fig. 7). In both species, there was less differentiation among  
397 marine than freshwater populations (Fig. 1d). Furthermore, in the case of the nine-spined  
398 stickleback, IBD was significant in both marine and freshwater environments (MLPE,  $p\leq 0.01$ ;  
399 Fig. 2). In the three-spined stickleback, IBD was significant in marine (MLPE,  $P<0.001$ ; Fig.  
400 2) but not in freshwater habitat (MLPE,  $P<0.26$ ; Fig. 2). A comparison of the IBD slopes  
401 (MLPE regression coefficient  $\beta$ ) revealed that the IBD in nine-spined sticklebacks was 23.9  
402 times stronger in the marine habitat (MLPE,  $\beta = 1.2e-4$  vs.  $5.1e-6$ ; Fig. 2).

### 403 **Phylogenetic histories**

404 The comparison of the time-calibrated phylogenies between three- and nine-spined  
405 sticklebacks (Fig. 3) revealed contrasting phylogenetic relationships and colonisation histories  
406 across their global distribution. The TMRCA of all lineages of nine-spined stickleback was  
407 2.146 Mya in late Pliocene (95% HPD interval [hereafter in parenthesis]: 1.800–2.503 Mya),  
408 which is much older than that of the three-spined stickleback 0.074 Mya in late Pleistocene  
409 (0.052–0.100 Mya).

410 The most ancient lineage of nine-spined sticklebacks was from the Western Atlantic (F in Fig.  
411 3). In contrast, the Western Atlantic clade of three-spined sticklebacks was among the  
412 youngest lineages, in line with earlier findings (Fang et al. 2018, 2020b). The most ancestral  
413 lineage in three-spined sticklebacks was from the Eastern Pacific clade (D in Fig. 3), whereas  
414 nine-spined sticklebacks from this area were more recently diverged (ALA lineage) with a  
415 divergence time close to the TMRCA of its European lineages (0.766 Mya [0.644–0.887  
416 Mya]; Fig. 3, Supplementary Fig. 5).

417 The European three-spined stickleback populations have diverged recently (A, B and C in  
418 Fig. 3; 0.026 Mya [0.018–0.035 Mya]), with significant incomplete lineage sorting among  
419 them. In contrast, the European nine-spined stickleback populations had deep and clear  
420 lineage separation (three lineages [A, B and C] diverged 0.762 Mya [0.638–0.882 Mya]), with  
421 evidence for introgression between the Eastern European (B) and the North Sea (C) lineages  
422 (Fig. 3; Feng et al. 2020).

### 423 **Patterns of genetic parallelism**

424 When including relatedness as a random effect in association tests between SMLAs and  
425 ecotype (EMMAX),  $\lambda$  was reduced from  $\lambda=1.95$  to  $\lambda=1.01$  and from  $\lambda=1.73$  to  $\lambda=1.32$  for

426 three- and nine-spined sticklebacks, respectively. Thus, accounting for relatedness reduced  $p$ -  
427 value inflation completely in three-spined sticklebacks, but not in nine-spined sticklebacks.  
428 Nevertheless, GC ensured that any residual  $p$ -value inflation was accounted for except when  
429 using permutation. After corrections for  $p$ -value inflation and multiplicity, the number of  
430 outlier regions that were significant in at least 5% of all parameter combinations/correction  
431 methods ( $C \geq 0.05$ ) was 26 for three-spined sticklebacks and nine for nine-spined sticklebacks  
432 (Fig. 4 & 5). While no single parameter combination detected all these outlier regions the  
433 most successful LDna parameter settings for three-spined sticklebacks were  $|E|_{min}=10$ ,  
434  $Cor_{th}=0.5$  and any combination of  $SNP_{min}=[10, 20]$  (detecting all but the two ChrIX outlier  
435 regions) with the corresponding parameter settings for nine-spined sticklebacks being  
436  $|E|_{min}=20$ ,  $SNP_{min}=10$  and any combination of  $Cor_{th}=[0.6, 0.7, 0.8]$  (detecting all but the  
437 ChrXIV outlier region). However, no outlier regions in nine-spined sticklebacks were found  
438 in  $>50\%$  ( $C > 0.5$ ) of the parameter combinations, while this was the case for seven outlier  
439 regions in three-spined sticklebacks (Fig. 5; Supplementary Table 1), with the corresponding  
440 numbers for  $C > 0.25$  being 13 and four, respectively. Thus, regardless of  $C$ -score, the number  
441 of outlier regions detected were always larger in three- than in nine-spined sticklebacks,  
442 showing that outlier detection in nine-spined sticklebacks was more dependent on parameter  
443 settings than that in three-spined sticklebacks. As a consequence, widely different results  
444 could have been obtained, particularly for nine-spined sticklebacks, if only a single (arbitrary)  
445 parameter setting would have been chosen for LDna.

446 While all outlier regions with high  $C$ -scores tended to also have large effect sizes (Fig. 5),  
447 some outlier regions with large effect sizes (e.g. Chr17\_1, Chr20\_4 and Chr20\_5 for three-  
448 spined sticklebacks and Chr14\_1 for nine-spined sticklebacks) did not have high  $C$ -scores  
449 (Fig. 5). These regions were more sensitive to parameter settings, but when they were  
450 detected, they tended nevertheless to have large effect sizes (and be highly significant). The

451 Chr14\_1 ( $C=0.11$ ) outlier region in nine-spined sticklebacks, for instance (with the  $cor=0.45$   
452 [95% quantile for all LD-clusters mapping to the region] both when correcting and not  
453 correcting for relatedness), was only detected when  $|E|_{min}=40$  and  $SNP_{min}=40$ .

454 Focusing on four different geographic regions within the Atlantic Ocean, the mean effect size  
455 (estimated based SMLAs from all significant loci from a given outlier region) across all  
456 genomic regions was  $cor_{unrl}=0.38$  (sd=0.24) and  $cor_A=0.28$  (sd=0.17) for three-spined  
457 sticklebacks and  $cor_{unrl}=0.29$  (sd=0.20) and  $cor_A=0.27$  (sd=0.17) for nine-spined stickleback.  
458 In both species, no outlier region associated with marine-freshwater parallelism displayed  
459 universally high effect sizes across all analysed geographic regions (Fig. 6). The geographic  
460 region with the highest mean effect size across the outlier regions for three-spined  
461 sticklebacks was the Norwegian Sea ( $cor_{unrl}=0.38$ , sd=0.17;  $cor_A=0.66$ , sd=0.2), with least  
462 evidence for parallelism being found in White & Barents Sea ( $cor_{unrl}=0.24$ , sd=0.15;  
463  $cor_A=0.14$ , sd=0.078) and in the Baltic Sea regions ( $cor_{unrl}=0.294$ , sd=0.19;  $cor_A=0.22$ ,  
464 sd=0.14). In contrast, the two geographic regions with highest effect sizes across all outlier  
465 genomic regions in nine-spined sticklebacks were the opposite of three-spined sticklebacks,  
466 namely White & Barents Sea ( $cor_{unrl}=0.43$ , sd=0.17;  $cor_A=0.39$ , sd=0.17) and the Baltic Sea  
467 regions ( $cor_{unrl}=0.41$ , sd=0.22;  $cor_A=0.42$ , sd=0.19).

468 The mean size for outlier regions was 3.0 times larger for three-spined sticklebacks compared  
469 to nine-spined sticklebacks (154Kbps vs. 52Kbps; Supplementary Table 1), with the mean  
470 number of unique significant loci mapping to each region being 2.7 times larger in three-  
471 compared to nine-spined sticklebacks (115 SNPs with a range of 10-1341 vs. 42 SNPs with a  
472 range of 10-109). The total number of loci from significant LD-clusters mapping to outlier  
473 regions was 379 and 2996, for three-spined and nine-spined sticklebacks, respectively.

474 However, a large proportion of the loci (43%) in three-spined sticklebacks mapped to the  
475 Chr1 inversion.

476 The genomic regions under parallel evolution in three-spined sticklebacks show an excess in  
477 absolute divergence ( $\Delta d_{XY}$ ) compared to neutral genomic regions, suggesting ancient origin of  
478 the selected regions (as per Nelson & Cresko 2018). On the contrary, the genomic regions  
479 under parallel evolution in nine-spined sticklebacks do not show significant  $\Delta d_{XY}$ .  
480 Specifically, in three-spined sticklebacks, 16 out of 26 genomic regions under selection had  
481 higher  $\Delta d_{XY}$  than the 95% CI of  $\Delta d_{XY}$  estimated from 100 random “neutral” regions across the  
482 genome 1 (Fig. 4a-d, Supplementary Fig. 8). Those ancient regions included EDA gene and  
483 the inversion in Chr1 (Jones et al. 2012; Fang et al. 2020a; Fig. 4d,b). In contrast, only one  
484 out of nine regions under selection in nine-spined sticklebacks showed (slightly) higher  $\Delta d_{XY}$ ,  
485 approaching the 95% CI of  $\Delta d_{XY}$  for neutral regions (Fig. 4k). Full results of genetic diversity  
486 and divergence in the candidate genomic regions were given in Supplementary Fig. 8.

487 There was a significant negative correlation between divergence times and the level the  
488 genetic parallelism in nine-spined sticklebacks (MLPE:  $\beta=-2e-4$ ,  $P<0.001$ ; Supplementary  
489 Fig. 9). However, there was no significant correlation in three-spined sticklebacks (MLPE:  
490  $\beta=-0.014$ ,  $P=0.76$ ; Supplementary Fig. 9).

491

## 492 **Discussion**

493 Theory predicts the probability of parallel evolution to be negatively correlated with  
494 divergence time and positively correlated with effective population size and population  
495 connectivity (MacPherson & Nuismer 2017). Despite their similar life histories, ecologies and  
496 distribution ranges, three- and nine-spined sticklebacks show dramatically different  
497 phylogenetic histories, within population genetic diversities and population structuring across  
498 comparable geographic distances and as predicted, very different levels of genetic parallelism  
499 in response to colonisation of freshwater environments. As the results show, gene flow

500 between nine-spined stickleback populations is more restricted than between three-spined  
501 stickleback populations, resulting in a more heterogeneous pool of SGV available for  
502 freshwater adaptation, thereby reducing the probability of parallel evolution in the former.  
503 These findings indicate that the two species differ markedly in the fundamental processes  
504 affecting the distribution of adaptive genetic variation among their demes.

505 Three-spined sticklebacks displayed a larger number (2.9 times) of genomic regions involved  
506 in marine-freshwater parallelism than nine-spined sticklebacks, and these regions were on  
507 average three times larger and harboured eight times more loci. Most outlier regions in three-  
508 spined sticklebacks show excess divergence ( $\Delta d_{XY}$ ), a result in line with evidence from other  
509 studies (Nelson & Cresko 2018) suggesting ancient origins of haplotypes involved in parallel  
510 evolution in this species. In contrast, the outlier regions in nine-spined sticklebacks do not  
511 follow the same pattern (i.e. no significant  $\Delta d_{XY}$ ). Furthermore, for both species, no marine-  
512 freshwater divergence associated region showed high effect sizes across all studied  
513 geographic regions, suggesting that parallelism is often geographically limited. Below we  
514 discuss how these findings shed new light into our understanding of how geographic patterns  
515 of parallel local adaptation is shaped by demographic and phylogenetic history.

516

### 517 *Genetic diversity, population connectivity and phylogenetic history*

518 Genetic diversity was generally lower for nine- than three-spined sticklebacks and in  
519 freshwater compared to marine populations. These findings align with earlier studies showing  
520 lower genetic diversity in nine- than in three-spined stickleback populations (DeFaveri et al.  
521 2012; Merilä 2013), and in freshwater fish populations than marine fish populations in general  
522 (Avice et al. 1987; DeWoody & Avice 2000; McCusker & Bentzen 2010; Ward et al. 1994;

523 Ward et al. 1992). Assuming that three-and nine-spined sticklebacks exhibit similar mutation  
524 rates, the observed differences in  $\theta$  (three-spined > nine-spined stickleback) should reflect  
525 differences in coalescent  $N_e$  (as  $\theta = 4N_e\mu$ ). Hence, lower  $N_e$ , stronger population structure and  
526 stronger IBD all contribute to more heterogeneous pools of SGV in nine-spined than in three-  
527 spined sticklebacks. Assuming that adaptive genetic variation follows the same general  
528 pattern, SGV for freshwater adaptation is expected to be considerably reduced in nine-  
529 compared to three-spined sticklebacks.

530 Our analyses revealed that the nine-spined stickleback lineages were far older than three-  
531 spined stickleback lineages, and that the degree genetic parallelism decreased as an increasing  
532 function of divergence time in the nine-spined stickleback. All this supports the notion that  
533 differences in divergence time influence the probability of parallel evolution, as pools of SVG  
534 get increasingly differentiated with time (MacPherson & Nuismer 2017). However, the  
535 question of which is a more important determinant of the probability of parallel evolution -  
536 divergence time or gene flow – is not easily answered because the two are not independent:  
537 restricted gene flow is a prerequisite for the formation and maintenance of distinct lineages. It  
538 is therefore difficult to disentangle the effect of current population structure and past  
539 divergence on the levels of genetic parallelism because both are functions of the species  
540 demographic history.

#### 541 *Geographic heterogeneity in selection optima?*

542 Parallel evolution not only requires access to the same pool of SGV (Barrett & Schluter 2008;  
543 Schluter & Conte 2009), but also parallelism of selection optima across the distribution range,  
544 which cannot be taken for granted (Bolnick et al. 2018; Magalhaes et al. 2020; Stuart et al.  
545 2017). Thus, lower parallelism in selection optima across freshwater habitats could also



546 explain the lower degree of parallelism in nine- than three-spined sticklebacks. However,  
547 geographic differences in SGV can result in contrasting patterns of genetic parallelism, both  
548 globally (Fang et al. 2020a) and locally (Leinonen et al. 2012). Based on a small subset of the  
549 data used here, simulations in Kempainen et al. 2021 show that the level of IBD  
550 characteristic of nine-spined stickleback populations (as opposed to three-spined stickleback-  
551 like scenarios) is sufficient to severely restrict SGV for local adaptation. Thus, while parallel  
552 angles of selection are a prerequisite, parallel evolution also relies on access to the necessary  
553 ancestral SGV for local adaptation. That ancestral SGV in turn is determined by population  
554 demographic parameters such as  $N_e$  and population connectivity.

555 The reported differences in the degree of parallel evolution between two stickleback species  
556 could be argued to be an artefact of the inherent difficulty of detecting outlier loci among  
557 highly differentiated populations (Galloway et al. 2020; Hoban et al. 2016; Matthey-Doret &  
558 Whitlock 2019). However, whenever background differentiation is high (due to population  
559 structuring), we can also expect  $p$ -value inflation due to relatedness. Accounting for  
560 relatedness can in some circumstances be expected to increase statistical power to detect  
561 outliers (Kang et al. 2010; Kang et al. 2008). For instance, when multiple populations in  
562 similar habitats display high frequencies of the same genetic variants (i.e. parallel evolution);  
563 the more divergent the populations are, the stronger the contrast between neutral genetic  
564 background (reflecting relatedness) and genomic regions under selection will be. Since  
565 neither effect sizes nor  $p$ -value inflation (both of which are important determinants of  
566 statistical power) differed much between nine-and three-spined sticklebacks for the outlier  
567 regions, there is no reason to doubt the conclusion that the marine-freshwater differentiated  
568 regions in three-spined sticklebacks outnumber such regions in nine-spined sticklebacks

569 across a wide range of parameter/threshold values and correction methods. This and other  
570 methodological considerations are discussed further in Supplementary Information 2.

571 *Geographic heterogeneity in marine-freshwater parallelism*

572 Historically, much of the parallel evolution research in three-spined sticklebacks has focused  
573 on Eastern Pacific populations (reviewed in Fang et al. 2020a). However, it is becoming  
574 increasingly clear that parallelism in three-spined sticklebacks is not as universal and global  
575 as previously thought (Fang et al. 2020a). This is also clear from our analyses (with more  
576 extensive geographic coverage than in previous studies), where heterogeneity in effect sizes  
577 across the different geographic region was found not only in nine- (where this was expected)  
578 but also in three-spined sticklebacks. In our analyses of genetic parallelism, we limited our  
579 comparisons to the Atlantic region as we lacked samples of marine nine-spined sticklebacks  
580 from the Eastern and Western Pacific regions. Therefore, we do not know if the patterns seen  
581 in the Atlantic region can be generalized to the rest of the species distribution range.

582 However, there is a good reason to believe that inclusion of populations from the Eastern  
583 Pacific would have revealed stronger, not weaker, differences in levels of parallel evolution  
584 between the two taxa. Namely, the extent of genetic parallelism in the three-spined  
585 stickleback from the Pacific region is far stronger than that in the Atlantic (Fang et al. 2020a).  
586 While this might at first suggest that inclusion of Eastern Pacific samples to the comparison  
587 might recover more genetic parallelism also in the nine-spined stickleback, we believe the  
588 opposite is more likely to be true. The Eastern Pacific is the ancestral range of the three-  
589 spined stickleback, which harbours most of the SGV involved in marine-freshwater  
590 adaptation (Fang et al. 2020a; Fang et al. 2020b; Fang et al. 2018). In contrast to three-spined  
591 sticklebacks, the oldest populations of nine-spined sticklebacks are located in the Western  
592 Atlantic region (Fig. 3), and therefore, it is logical to assume that at least a part of the SGV

593 involved in parallel evolution might have been lost during the invasion of the Pacific region.  
594 Hence, the inclusion of Pacific populations of both species into the analyses would likely  
595 reveal even stronger differences than observed now.

#### 596 *Age of freshwater adapted alleles*

597 While nine-spined stickleback populations have a longer evolutionary history than the three-  
598 spined stickleback populations, the genomic regions under parallel selection in three-spined  
599 sticklebacks appear to be of more ancient origin than the populations in which they are  
600 segregating. A possible explanation for this counterintuitive finding may lie in the effect of  
601 gene flow and  $N_e$  on the ability of species maintain ancestral haplotypes in the pool of SGV;  
602 the larger  $N_e$  and the weaker population subdivision makes this scenario more likely in three-  
603 compared to nine-spined sticklebacks. Although the Atlantic three-spined stickleback  
604 populations have a relatively young evolutionary history (colonisation occurred 29.5-226.6  
605 Kya; Fang et al. 2020b), the freshwater-adapted alleles in the SGV pool were inherited  
606 originate from Eastern Pacific region (Fang et al. 2020a), which harbours these ancient t  
607 haplotypes (~six million years old; Nelson & Cresko 2018). In contrast, lower  $N_e$  and gene  
608 flow in the nine-spined stickleback marine populations is expected to limit the maintenance  
609 and geographic spread of SGV. This could lead to higher turnover rates of freshwater adapted  
610 alleles, higher dependence on novel mutations and consequently higher geographic  
611 heterogeneity in parallel evolution in nine-spined sticklebacks.

#### 612 *Implications for local adaptation*

613 The implications of the absence of a homogenous pool of SGV in the nine-spined stickleback  
614 are relevant to local adaptation in general. Populations colonizing new environments may lose  
615 potentially beneficial variation via bottlenecks and founder events. With limited or absent

616 gene flow, the lost variability cannot easily be regained. Consistent with this, Kempainen et  
617 al. 2021 demonstrated that the genetic architectures underlying pelvic reduction (a common  
618 freshwater adaptation in sticklebacks) is highly heterogeneous in nine-spined sticklebacks  
619 even across short (<10 km) geographic distances. In addition, many freshwater populations  
620 lacked pelvic reduction altogether probably because they lacked the SGV underlying this trait,  
621 thus restricting the populations to suboptimal phenotypes. A possible example where  
622 restricted access to SGV has led to potentially less optimal freshwater adaptation can also be  
623 found in three-spined sticklebacks. In a small and isolated region in the northern Finland,  
624 fully plated three-spined sticklebacks displayed reduced lateral plate height possibly as a  
625 compensatory adaptation to the genetic constraint imposed by the lack of the low-plate EDA  
626 allele in these populations (Leinonen et al. 2012). Thus, it is important to note that lack of  
627 large pool of SGV not only limits parallel evolution, but also local adaptation more generally.

628 The lack of SGV to fuel local adaptation can be mitigated by introgression between divergent  
629 clades as this can substantially increase the genetic variation in the affected populations  
630 (Anderson 1949; Arnold 1997; Marques et al. 2019). This appears to be the case for the Baltic  
631 Sea nine-spined stickleback populations which have experienced introgression from divergent  
632 western European populations (Feng et al. 2020; Shikano et al. 2010b; Teacher et al. 2011); a  
633 comparison of admixed and non-admixed populations revealed the former to have  
634 significantly higher heterozygosity than the latter. Since admixed populations were excluded  
635 from the analyses of within population genetic diversity, this did not have any effect on our  
636 inference beyond reducing sample sizes available for analyses. Nevertheless, the results  
637 demonstrate that introgression is an important determinant of genetic diversity, and thus  
638 potentially also of the adaptive potential of populations. This is consistent with Baltic Sea  
639 having large effect sizes for a subset of the regions that have large effect sizes also in the

640 White & Barents Sea possibly compensating for the lack of freshwater adaptations in the  
641 Western lineage (which have much lower effect sizes for all outlier regions).

642 *Genetic differentiation and speciation*

643 It is intriguing that the two species of sticklebacks studied here do not display only highly  
644 contrasting population structures but come from different genera containing an equally  
645 contrasting number of recognized species. While it is tempting to think that there could be a  
646 causal connection between among population connectivity and propensity to speciate, one  
647 needs to notice that there is also evidence to suggest that there may be yet undescribed species  
648 in both genera (Guo et al. 2019; Taylor et al. 2006). Hence, counting taxonomically valid  
649 species as proxies of speciosity can be misleading.

650 What may be more interesting to consider is the process of speciation. In the case of the three-  
651 spined stickleback “species pairs”, speciation seems to progress rapidly towards completion,  
652 but full reproductive isolation is not usually reached (McKinnon & Rundle 2002). In fact,  
653 whenever the ecological conditions that drove the evolution of reproductive isolation in the  
654 first place cease to exist, hybridization and reverse speciation is known to occur (Marques et  
655 al. 2019; Rudman & Schluter 2016). Hence, this suggests that strong genetic incompatibilities  
656 have not had time to evolve. The marked between species difference in divergence times of  
657 local three- and nine-spined populations shown in this study suggest that one should expect  
658 speciation through accumulation of genetic incompatibilities to be much more likely in the  
659 *Pungitius* than in the *Gasterosteus* genus. There is indeed some evidence for evolution of  
660 incompatibilities in *Pungitius* (Natri et al. 2019), and although hybridization has occurred  
661 fairly frequently (Guo et al. 2019), the species have not collapsed into hybrid swarms. It is  
662 tempting to speculate that the same features that can drive local adaptation and initial progress

663 along the speciation continuum in the short term are actually limiting factors in driving  
664 speciation to completion. Hence, the two genera should provide an interesting model system  
665 for future studies focused on the roles of adaptive divergence vs. incompatibilities in  
666 generating new species.

667 In conclusion, the results establish that the two co-distributed stickleback species possess  
668 strikingly different population genetic structures suggesting far more limited gene flow, and  
669 hence, a more heterogeneous pool of SGV among the nine-spined, than among the three-  
670 spined stickleback populations. This greater heterogeneity likely underlies the observed lower  
671 degree of genetic parallelism among the nine-spined stickleback populations. Furthermore,  
672 there appears to be generally less SGV in the nine- than in the three-spined stickleback,  
673 possibly because of lower long-term effective population sizes of the latter. However, high  
674 levels of SGV were detected in those few nine-spined stickleback populations where  
675 introgression from other related lineages or species has been documented. All in all, the  
676 results suggest that because of the contrasting levels of heterogeneity in SVG, the two  
677 stickleback species are differently disposed to adapt similar selection pressures via parallel  
678 and non-parallel genetic mechanisms.

679

### 680 *Acknowledgements*

681 We thank members of EGRU for very useful feedback and discussions during the manuscript  
682 preparation, and Sami Karja, Kirsi Kähkönen, Laura Hänninen and Miinastiina Issakainen for  
683 help with the laboratory work and its planning. We are also grateful for all the people who  
684 helped in sampling and obtaining the nine-spined stickleback samples used in this study,  
685 including: Michael Bell, Victootr Berger, Pär Byström, Jacquelin De Faveri, Lasse Fast

686 Jensen, Abigel Gonda, Gábor Herczeg, Kjetill Hindar, Nellie Konijnendijk, Dmitry Lajus,  
687 Tuomas Leinonen, Vladimir Loginov, Scott McCairns, Andrew McColl, Henri Persat, Tom  
688 Pike and Joost Raeymaekers. Our research was support by Academy of Finland (grants #  
689 129662, 134728 and 218343 for JM; 1316294 to PM), Helsinki Institute of Life Sciences  
690 (HiLife for JM), Finnish Cultural Foundation (00190489 to PK), and Chinese Scholarship  
691 Council grant (201606270188) to BF.

692

## References

- 693  
694  
695  
696 Anderson E (1949) Introgressive hybridization. *Introgressive hybridization*.
- 697  
698 Arendt J, Reznick D (2008) Convergence and parallelism reconsidered: what have we learned about  
the genetics of adaptation? *Trends in Ecology & Evolution* **23**, 26-32.
- 699  
700 Arnold ML (1997) *Natural hybridization and evolution* Oxford University Press on Demand.
- 701  
702 Avise JC, Reeb CA, Saunders NC (1987) Geographic population structure and species differences in  
mitochondrial DNA of mouthbrooding marine cichlids (Ariidae) and demersal spawning  
toadfishes (Batrachoididae). *Evolution* **41**, 991-1002.
- 703  
704 Bailey SF, Blanquart F, Bataillon T, Kassen R (2017) What drives parallel evolution?: How population  
size and mutational variation contribute to repeated evolution. *Bioessays* **39**, 1-9.
- 705  
706 Baker J (1994) Life history variation in female threespine stickleback. In: *The evolutionary biology of  
the threespine stickleback*. Oxford Univ. Press.
- 707  
708 Barghi N, Tobler R, Nolte V, *et al.* (2019) Genetic redundancy fuels polygenic adaptation in  
*Drosophila*. *PLoS Biology* **17**, e3000128.
- 709  
710 Barrett RD, Schluter D (2008) Adaptation from standing genetic variation. *Trends in Ecology &  
Evolution* **23**, 38-44.
- 711  
712 Bates D, Mächler M, Bolker B, Walker S (2014) Fitting linear mixed-effects models using lme4. *arXiv  
preprint arXiv:1406.5823*.
- 713  
714 Benjamini Y, Hochberg Y (1995) Controlling the false discovery rate: a practical and powerful  
approach to multiple testing. *Journal of the Royal Statistical Society, Series B (Statistical  
Methodology)* **57**, 289-300.
- 715  
716 Bolnick DI, Barrett RDH, Oke KB, Rennison DJ, Stuart YE (2018) (Non)Parallel Evolution. *Annual  
Review of Ecology Evolution and Systematics* **49**, 303-330.
- 717  
718 Bouckaert R, Bryant D (2012) A rough guide to SNAPP.
- 719  
720 Chifman J, Kubatko L (2014) Quartet inference from SNP data under the coalescent model.  
*Bioinformatics* **30**, 3317-3324.
- 721  
722 Clarke RT, Rothery P, Raybould AF (2002) Confidence limits for regression relationships between  
distance matrices: estimating gene flow with distance. *Journal of Agricultural Biological and  
Environmental Statistics* **7**, 361.
- 723  
724 Colosimo PF, Hosemann KE, Balabhadra S, *et al.* (2005) Widespread parallel evolution in  
sticklebacks by repeated fixation of Ectodysplasin alleles. *Science* **307**, 1928-1933.
- 725  
726 Conte GL, Arnegard ME, Peichel CL, Schluter D (2012) The probability of genetic parallelism and  
convergence in natural populations. *Proceedings of the Royal Society B: Biological Sciences*  
727  
728 **279**, 5039-5047.
- 729  
730 Copp GH, Kovac V (2003) Sympatry between threespine *Gasterosteus aculeatus* and ninespine  
731 *Pungitius pungitius* sticklebacks in English lowland streams. *Annales Zoologici Fennici* **40**,  
341-355.



- 732 Cowen RK, Chiarella LA, Gomez CJ, Bell MA (1991) Offshore distribution, size, age, and lateral plate  
733 variation of late larval/early juvenile sticklebacks (*Gasterosteus*) off the Atlantic coast of New  
734 Jersey and New York. *Canadian Journal of Fisheries and Aquatic Sciences* **48**, 1679-1684.
- 735 DeFaveri J, Merilä J (2013) Variation in age and size in Fennoscandian three-spined sticklebacks  
736 (*Gasterosteus aculeatus*). *PLoS ONE* **8**, e80866.
- 737 DeFaveri J, Shikano T, Ab Ghani NI, Merila J (2012) Contrasting population structures in two  
738 sympatric fishes in the Baltic Sea basin. *Marine Biology* **159**, 1659-1672.
- 739 DeFaveri J, Shikano T, Merilä J (2014) Geographic variation in age structure and longevity in the nine-  
740 spined stickleback (*Pungitius pungitius*). *PLoS ONE* **9**, e102660.
- 741 DeFaveri J, Shikano T, Shimada Y, Goto A, Merila J (2011) Global analysis of genes involved in  
742 freshwater adaptation in threespine sticklebacks (*Gasterosteus aculeatus*). *Evolution* **65**,  
743 1800-1807.
- 744 DeWoody J, Avise J (2000) Microsatellite variation in marine, freshwater and anadromous fishes  
745 compared with other animals. *Journal of Fish Biology* **56**, 461-473.
- 746 Dutoit L, Vijay N, Mugal CF, *et al.* (2017) Covariation in levels of nucleotide diversity in homologous  
747 regions of the avian genome long after completion of lineage sorting. *Proceedings of the*  
748 *Royal Society B: Biological Sciences* **284**, 20162756.
- 749 Ellegren H, Galtier N (2016) Determinants of genetic diversity. *Nature Reviews Genetics* **17**, 422-433.
- 750 Elmer KR, Fan S, Kusche H, *et al.* (2014) Parallel evolution of Nicaraguan crater lake cichlid fishes via  
751 non-parallel routes. *Nature Communications* **5**, 5168.
- 752 Elmer KR, Meyer A (2011) Adaptation in the age of ecological genomics: insights from parallelism and  
753 convergence. *Trends in Ecology & Evolution* **26**, 298-306.
- 754 Eschmeyer WN, Fricke R, Van der Laan R (2017) Catalog of fishes: genera, species, references.
- 755 Fang B, Kempainen P, Momigliano P, Feng X, Merilä J (2020a) On the causes of geographically  
756 heterogeneous parallel evolution in sticklebacks. *Nature Ecology and Evolution* **4**, 1105-1115.
- 757 Fang B, Merilä J, Matschiner M, Momigliano P (2020b) Estimating uncertainty in divergence times  
758 among three-spined stickleback clades using the multispecies coalescent. *Molecular*  
759 *Phylogenetics and Evolution* **142**, 1055-7903.
- 760 Fang B, Merilä J, Ribeiro F, Alexandre CM, Momigliano P (2018) Worldwide phylogeny of three-spined  
761 sticklebacks. *Molecular Phylogenetics and Evolution* **127**, 613-625.
- 762 Feng X, Merilä J, Löytynoja A (2020) We shall meet again - Genomics of historical admixture in the  
763 sea. *bioRxiv* <https://doi.org/10.1101/2020.05.01.069740>.
- 764 Feulner PG, Chain FJ, Panchal M, *et al.* (2013) Genome-wide patterns of standing genetic variation in  
765 a marine population of three-spined sticklebacks. *Molecular Ecology* **22**, 635-649.
- 766 Fox EA, Wright AE, Fumagalli M, Vieira FG (2019) ngsLD: evaluating linkage disequilibrium using  
767 genotype likelihoods. *Bioinformatics* **35**, 3855-3856.
- 768 Fox J, Weisberg S, Adler D, *et al.* (2012) Package 'car'. *Vienna: R Foundation for Statistical*  
769 *Computing*.
- 770 Galloway J, Cresko WA, Ralph P (2020) A few stickleback suffice for the transport of alleles to new  
771 lakes. *G3: Genes, Genomes, Genetics* **10**, 505-514.

- 772 Goudet J (2005) Hierfstat, a package for R to compute and test hierarchical F-statistics. *Molecular*  
773 *Ecology Notes* **5**, 184-186.
- 774 Guo B, Fang B, Shikano T, *et al.* (2019) A phylogenomic perspective on diversity, hybridization and  
775 evolutionary affinities in the stickleback genus *Pungitius*. *Molecular Ecology* **28**, 4046-4064.
- 776 Heins DC, Baker JA (2003) Reduction of egg size in natural populations of threespine stickleback  
777 infected with a cestode macroparasite. *Journal of Parasitology* **89**, 1-6.
- 778 Herczeg G, Turtiainen M, Merila J (2010) Morphological divergence of North-European nine-spined  
779 sticklebacks (*Pungitius pungitius*): signatures of parallel evolution. *Biological Journal of the*  
780 *Linnean Society* **101**, 403-416.
- 781 Hijmans RJ, van Etten J (2014) raster: Geographic data analysis and modeling. *R package version 2*.
- 782 Hoban S, Kelley JL, Lotterhos KE, *et al.* (2016) Finding the Genomic Basis of Local Adaptation:  
783 Pitfalls, Practical Solutions, and Future Directions. *American naturalist* **188**, 379-397.
- 784 Hohenlohe PA, Bassham S, Etter PD, *et al.* (2010) Population genomics of parallel adaptation in  
785 threespine stickleback using sequenced RAD tags. *PLoS Genetics* **6**, e1000862.
- 786 Hohenlohe PA, Magalhaes IS (2019) The population genomics of parallel adaptation: lessons from  
787 threespine stickleback. In: *Population Genomics: Marine Organisms* (eds. Oleksiak MF,  
788 Rajora OP), pp. 249-276. Springer International Publishing, Cham.
- 789 Jones FC, Grabherr MG, Chan YF, *et al.* (2012) The genomic basis of adaptive evolution in threespine  
790 sticklebacks. *Nature* **484**, 55-61.
- 791 Jurvelius J, Leinikki J, Mamylov V, Pushkin S (1996) Stock assessment of pelagic three-spined  
792 stickleback (*Gasterosteus aculeatus*): a simultaneous up-and down-looking echo-sounding  
793 study. *Fisheries Research* **27**, 227-241.
- 794 Kang HM, Sul JH, Service SK, *et al.* (2010) Variance component model to account for sample  
795 structure in genome-wide association studies. *Nature Genetics* **42**, 348-354.
- 796 Kang HM, Zaitlen NA, Wade CM, *et al.* (2008) Efficient control of population structure in model  
797 organism association mapping. *Genetics* **178**, 1709-1723.
- 798 Kempainen P, Knight CG, Sarma DK, *et al.* (2015) Linkage disequilibrium network analysis (LDna)  
799 gives a global view of chromosomal inversions, local adaptation and geographic structure.  
800 *Molecular Ecology Resources* **15**, 1031-1045.
- 801 Kempainen P, Li Z, Rastas P, *et al.* (2021) Genetic population structure constrains local adaptation in  
802 sticklebacks. *Molecular Ecology In press*.
- 803 Kempainen P, Ronning B, Kvalnes T, *et al.* (2017) Controlling for P-value inflation in allele frequency  
804 change in experimental evolution and artificial selection experiments. *Molecular Ecology*  
805 *Resources* **17**, 770-782.
- 806 Kingman GAR, Vyas DN, Jones FC, *et al.* (2020) Predicting future from past: The genomic basis of  
807 recurrent and rapid stickleback evolution. *bioRxiv*.
- 808 Korneliussen TS, Albrechtsen A, Nielsen R (2014) ANGSD: Analysis of next generation sequencing  
809 data. *BMC Bioinformatics* **15**, 356.
- 810 Lee KM, Coop G (2017) Distinguishing Among Modes of Convergent Adaptation Using Population  
811 Genomic Data. *Genetics* **207**, 1591-1619.

- 812 Leinonen T, McCairns RJ, Herczeg G, Merila J (2012) Multiple evolutionary pathways to decreased  
813 lateral plate coverage in freshwater threespine sticklebacks. *Evolution* **66**, 3866-3875.
- 814 Lenormand T (2002) Gene flow and the limits to natural selection. *Trends in Ecology & Evolution* **17**,  
815 183-189.
- 816 Li H, Durbin RJB (2010) Fast and accurate long-read alignment with Burrows–Wheeler transform.  
817 *Bioinformatics* **26**, 589-595.
- 818 Li Z, Kempainen P, Rastas P, Merilä J (2018) Linkage disequilibrium clustering-based approach for  
819 association mapping with tightly linked genome-wide data. *Molecular Ecology Resources* **18**,  
820 809-824.
- 821 MacPherson A, Nuismer SL (2017) The probability of parallel genetic evolution from standing genetic  
822 variation. *Journal of Evolutionary Biology* **30**, 326-337.
- 823 Magalhaes IS, Whiting JR, D'Agostino D, et al. (2020) Intercontinental genomic parallelism in multiple  
824 three-spined stickleback adaptive radiations. *Nature Ecology and Evolution* 10.1038/s41559-  
825 020-01341-8.
- 826 Marques DA, Lucek K, Sousa VC, Excoffier L, Seehausen O (2019) Admixture between old lineages  
827 facilitated contemporary ecological speciation in Lake Constance stickleback. *Nature*  
828 *Communications* **10**, 4240.
- 829 Matthey-Doret R, Whitlock MC (2019) Background selection and FST: consequences for detecting  
830 local adaptation. *Molecular Ecology* **28**, 3902-3914.
- 831 McCusker MR, Bentzen P (2010) Positive relationships between genetic diversity and abundance in  
832 fishes. *Molecular Ecology* **19**, 4852-4862.
- 833 McKinnon JS, Rundle HD (2002) Speciation in nature: the threespine stickleback model systems.  
834 *Trends in Ecology & Evolution* **17**, 480-488.
- 835 Meisner J, Albrechtsen A (2018) Inferring Population Structure and Admixture Proportions in Low-  
836 Depth NGS Data. *Genetics* **210**, 719-731.
- 837 Merilä J (2013) Nine-spined stickleback (*Pungitius pungitius*): an emerging model for evolutionary  
838 biology research. *Annals of the New York Academy of Sciences* **1289**, 18-35.
- 839 Merilä J (2014) Lakes and ponds as model systems to study parallel evolution. *Journal of Limnology*  
840 **73**, 33-45.
- 841 Natri HM, Merila J, Shikano T (2019) The evolution of sex determination associated with a  
842 chromosomal inversion. *Nature Communications* **10**, 145.
- 843 Nei M (1987) *Molecular evolutionary genetics* Columbia university press.
- 844 Nei M, Li WH (1979) Mathematical model for studying genetic variation in terms of restriction  
845 endonucleases. *Proceedings of the National Academy of Sciences of the United States of*  
846 *America* **76**, 5269-5273.
- 847 Nelson TC, Cresko WA (2018) Ancient genomic variation underlies repeated ecological adaptation in  
848 young stickleback populations. *Evolution Letters* **2**, 9-21.
- 849 Ojaveer E, Pihu E, Saat T (2003) *Fishes of Estonia* Estonian Academy Publishers.
- 850 Ord TJ, Summers TC (2015) Repeated evolution and the impact of evolutionary history on adaptation.  
851 *BMC Evolutionary Biology* **15**, 137.

- 852 Pante E, Simon-Bouhet B (2013) marmap: A package for importing, plotting and analyzing bathymetric  
853 and topographic data in R. *PLoS ONE* **8**, e73051.
- 854 Paradis E, Claude J, Strimmer K (2004) APE: analyses of phylogenetics and evolution in R language.  
855 *Bioinformatics* **20**, 289-290.
- 856 Pembleton LW, Cogan NOI, Forster JW (2013) StAMPP: an R package for calculation of genetic  
857 differentiation and structure of mixed-ploidy level populations. *Molecular Ecology Resources*  
858 **13**, 946-952.
- 859 Pinheiro J, Bates D, DebRoy S, Sarkar D (2017) R Core Team (2017) nlme: linear and nonlinear  
860 mixed effects models. R package version 3.1-131. *Computer software*] Retrieved from  
861 <https://CRAN.R-project.org/package=nlme>.
- 862 Price AL, Zaitlen NA, Reich D, Patterson N (2010) New approaches to population stratification in  
863 genome-wide association studies. *Nature Reviews Genetics* **11**, 459-463.
- 864 Quinn TP, Light JT (1989) Occurrence of threespine sticklebacks (*Gasterosteus aculeatus*) in the  
865 open North Pacific Ocean: migration or drift? *Canadian Journal of Zoology* **67**, 2850-2852.
- 866 Raeymaekers JAM, Chaturvedi A, Hablutzl PI, *et al.* (2017) Adaptive and non-adaptive divergence in  
867 a common landscape. *Nature Communications* **8**, 267.
- 868 Ralph PL, Coop G (2015) The role of standing variation in geographic convergent adaptation.  
869 *American naturalist* **186 Suppl 1**, S5-23.
- 870 Romiguier J, Gayral P, Ballenghien M, *et al.* (2014) Comparative population genomics in animals  
871 uncovers the determinants of genetic diversity. *Nature* **515**, 261-263.
- 872 Rosenblum EB, Parent CE, Brandt EE (2014) The Molecular Basis of Phenotypic Convergence.  
873 *Annual Review of Ecology, Evolution, and Systematics* **45**, 203-226.
- 874 Rudman SM, Schluter D (2016) Ecological impacts of reverse speciation in threespine stickleback.  
875 *Current Biology* **26**, 490-495.
- 876 Schluter D, Clifford EA, Nemethy M, McKinnon JS (2004) Parallel evolution and inheritance of  
877 quantitative traits. *The American Naturalist* **163**, 809-822.
- 878 Schluter D, Conte GL (2009) Genetics and ecological speciation. *Proceedings of the National*  
879 *Academy of Sciences of the United States of America* **106**, 9955-9962.
- 880 Shikano T, Ramadevi J, Merilä J (2010a) Identification of local- and habitat-dependent selection:  
881 scanning functionally important genes in nine-spined sticklebacks (*Pungitius pungitius*).  
882 *Molecular Biology and Evolution* **27**, 2775-2789.
- 883 Shikano T, Shimada Y, Herczeg G, Merilä J (2010b) History vs. habitat type: explaining the genetic  
884 structure of European nine-spined stickleback (*Pungitius pungitius*) populations. *Molecular*  
885 *Ecology* **19**, 1147-1161.
- 886 Slatkin M (1995) A measure of population subdivision based on microsatellite allele frequencies.  
887 *Genetics* **139**, 457-462.
- 888 Stange M, Sanchez-Villagra MR, Salzburger W, Matschiner M (2018) Bayesian Divergence-Time  
889 Estimation with Genome-Wide Single-Nucleotide Polymorphism Data of Sea Catfishes  
890 (Ariidae) Supports Miocene Closure of the Panamanian Isthmus. *Systematic Biology* **67**, 681-  
891 699.
- 892 Stern DL (2013) The genetic causes of convergent evolution. *Nature Reviews Genetics* **14**, 751-764.

- 893 Stuart YE, Veen T, Weber JN, *et al.* (2017) Contrasting effects of environment and genetics generate  
894 a continuum of parallel evolution. *Nature Ecology and Evolution* **1**, 158.
- 895 Sunnucks P, Hales DF (1996) Numerous transposed sequences of mitochondrial cytochrome oxidase  
896 I-II in aphids of the genus *Sitobion* (Hemiptera: Aphididae). *Molecular Biology and Evolution*  
897 **13**, 510-524.
- 898 Takahashi H, Moller PR, Shedko SV, *et al.* (2016) Species phylogeny and diversification process of  
899 Northeast Asian *Pungitius* revealed by AFLP and mtDNA markers. *Molecular Phylogenetics*  
900 *and Evolution* **99**, 44-52.
- 901 Taylor EB, Boughman JW, Groenenboom M, *et al.* (2006) Speciation in reverse: morphological and  
902 genetic evidence of the collapse of a three-spined stickleback (*Gasterosteus aculeatus*)  
903 species pair. *Molecular Ecology* **15**, 343-355.
- 904 Teacher AGF, Shikano T, Karjalainen ME, Merilä J (2011) Phylogeography and genetic structuring of  
905 European nine-spined sticklebacks (*Pungitius pungitius*)—mitochondrial DNA evidence. *PLoS*  
906 *ONE* **6**, e19476.
- 907 Thompson KA, Osmond MM, Schluter D (2019) Parallel genetic evolution and speciation from  
908 standing variation. *Evolution Letters* **3**, 129-141.
- 909 Varadharajan S, Rastas P, Loytynoja A, *et al.* (2019) A High-Quality Assembly of the Nine-Spined  
910 Stickleback (*Pungitius pungitius*) Genome. *Genome Biology and Evolution* **11**, 3291-3308.
- 911 Ward R, Woodwark M, Skibinski D (1994) A comparison of genetic diversity levels in marine,  
912 freshwater, and anadromous fishes. *Journal of Fish Biology* **44**, 213-232.
- 913 Ward RD, Skibinski DO, Woodwark M (1992) Protein heterozygosity, protein structure, and taxonomic  
914 differentiation. In: *Evolutionary biology*, pp. 73-159. Springer.
- 915 Watterson GA (1975) On the number of segregating sites in genetical models without recombination.  
916 *Theoretical Population Biology* **7**, 256-276.
- 917 Weir BS, Cockerham CC (1984) Estimating F-Statistics for the Analysis of Population Structure.  
918 *Evolution* **38**, 1358-1370.
- 919 Wootton RJ (1976) *Biology of the sticklebacks* Academic Press.
- 920 Wootton RJ (1984) *A functional biology of sticklebacks* Springer Science & Business Media.
- 921 Yates AD, Achuthan P, Akanni W, *et al.* (2020) Ensembl 2020. *Nucleic Acids Research* **48**, D682-  
922 D688.
- 923
- 924



## 925 **FIGURE LEGENDS**

---

926 **Figure 1 | Three-spined sticklebacks exhibit higher levels of genetic variation and lower**  
927 **degree of population differentiation than nine-spined sticklebacks.** (a) Map showing the  
928 species-specific sampling locations. (b, c) Pairwise population differentiation ( $F_{ST}$ ) of three-  
929 and nine-spined sticklebacks, respectively. Populations are specified in Supplementary Table  
930 2. (d) Global  $F_{ST}$  of the two species. Error bars indicate 95% bootstrap confident intervals. (e,  
931 f) Boxplots of Heterozygosity ( $H$ ) and nucleotide diversity ( $\pi$ ). Admixed populations in nine-  
932 spined stickleback are excluded in (e-f). See Supplementary Fig. 2 for the estimates of  
933 Watterson's theta ( $\theta$ ) and the effect of admixed populations on measures of genetic diversity.  
934 Generalized linear mixed model (GLMM) revealed significant differences in genetic diversity  
935 (e,f) between species and ecotypes (see Results).

936

937 **Figure 2 | Isolation by distance (IBD).** IBD was tested across (a) marine and (b) freshwater  
938 three- (red) and nine-spined stickleback (blue) populations using maximum-likelihood  
939 population-effects (MLPE) model. The slope of the regression coefficients ( $\beta$ ) suggest  
940 stronger IBD in nine- than in three-spined sticklebacks. IBD comparisons were restricted to  
941 European populations (see Materials and Methods).

942

943 **Figure 3 | Time-calibrated phylogenies of three- and nine-spined sticklebacks inferred**  
944 **with SNAPP.** The topology and divergence times of phylogenetic trees of nine- (left) and  
945 three-spined sticklebacks (right) are presented and compared using populations across the  
946 same, or geographically close, sampling sites. Colours correspond to the different lineages  
947 (A–F) of nine-spined sticklebacks. Arrows in the bottom indicate directions of timeline from

948 past to present. The TMRCA (time to the most recent common ancestor) of three-spined  
949 sticklebacks is marked in the timeline of the nine-spined sticklebacks for comparison.  
950 Population identifiers were simplified for clarity; see Supplementary Fig. 1e for a map of  
951 sampled populations. The maximum-clade-credibility summary trees of the SNAPP  
952 phylogenies indicating divergence times and calibration points are given in the  
953 Supplementary Fig. 3.

954

955 **Figure 4 | Three-spined sticklebacks exhibit stronger level of parallel genetic evolution**  
956 **than nine-spined sticklebacks.** (a,g) Manhattan plots of  $-\log_{10}(P)$  value testing for  
957 associations between LD-clusters and ecotype (EMMAX). Colour for each unique genomic  
958 region indicates the proportion of all combinations parameter/correction method settings a  
959 given region was found significant in ( $C$ -score) after corrections for multiple testing and  $p$ -  
960 value inflation (grey indicates  $C$ -score $<0.05$ ). (b-f, h-l) summaries of residuals of linear  
961 regression models based on the genetic diversity ( $\pi$ ) and genetic divergence ( $d_{XY}$ ) derived  
962 from marine–freshwater population pairs for selected outlier regions (see Materials and  
963 methods). The squared correlation coefficient ( $r^2$ ) is shown as an averaged value across all  
964 models from different population pairs. Summaries for all regions are given in the  
965 Supplementary Fig. 5. All models were statistically significant ( $P<0.001$ ).

966 **Figure 5 | Relationship between C-score and effect size.** Figure depicts  $C$  as a function of  
967 effect size ( $cor$ ; 95% quantile across all significant LD-clusters mapping to a given genomic  
968 region) for outlier genomic regions, when (left panel) relatedness is accounted for and (right  
969 panel) when individuals are assumed to be unrelated for three- and nine-spined sticklebacks  
970 (upper and lower panels, respectively). Size indicates the mean number of tests for significant  
971 LD-clusters for a given region (a function of  $|E|_{min}$ ,  $SNP_{min}$  and  $Cor_{th}$ , see main text for  
972 details), with smaller numbers indicating that a region is only significant when fewer and  
973 larger LD-clusters are tested and colour indicates the most significant P-value across any  
974 correction method (“A+fdr”, “A+perm”, “GC+fdr” and “perm”). Only outlier regions above  
975 the horizontal dashed line ( $C > 0.05$ ) are considered in our analyses. 3sp, three-spined  
976 stickleback; 9sp, nine-spined stickleback.

977

978 **Figure 6 | Regional parallelism.** Shown are heatmaps of effect sizes ( $cor$ ) from linear  
979 regressions between SMLAs and ecotype (EMMAX) for outlier regions ( $C\text{-score} \geq 0.05$ )  
980 separately for four geographic regions. Results are shown for (a) three- and (b) nine-spined  
981 sticklebacks, when assuming individuals are unrelated (unrl) and when a relatedness matrix  
982 (A) was included as a random effect. Grey side bars indicates the  $C$ -score.

983



## Figure 1

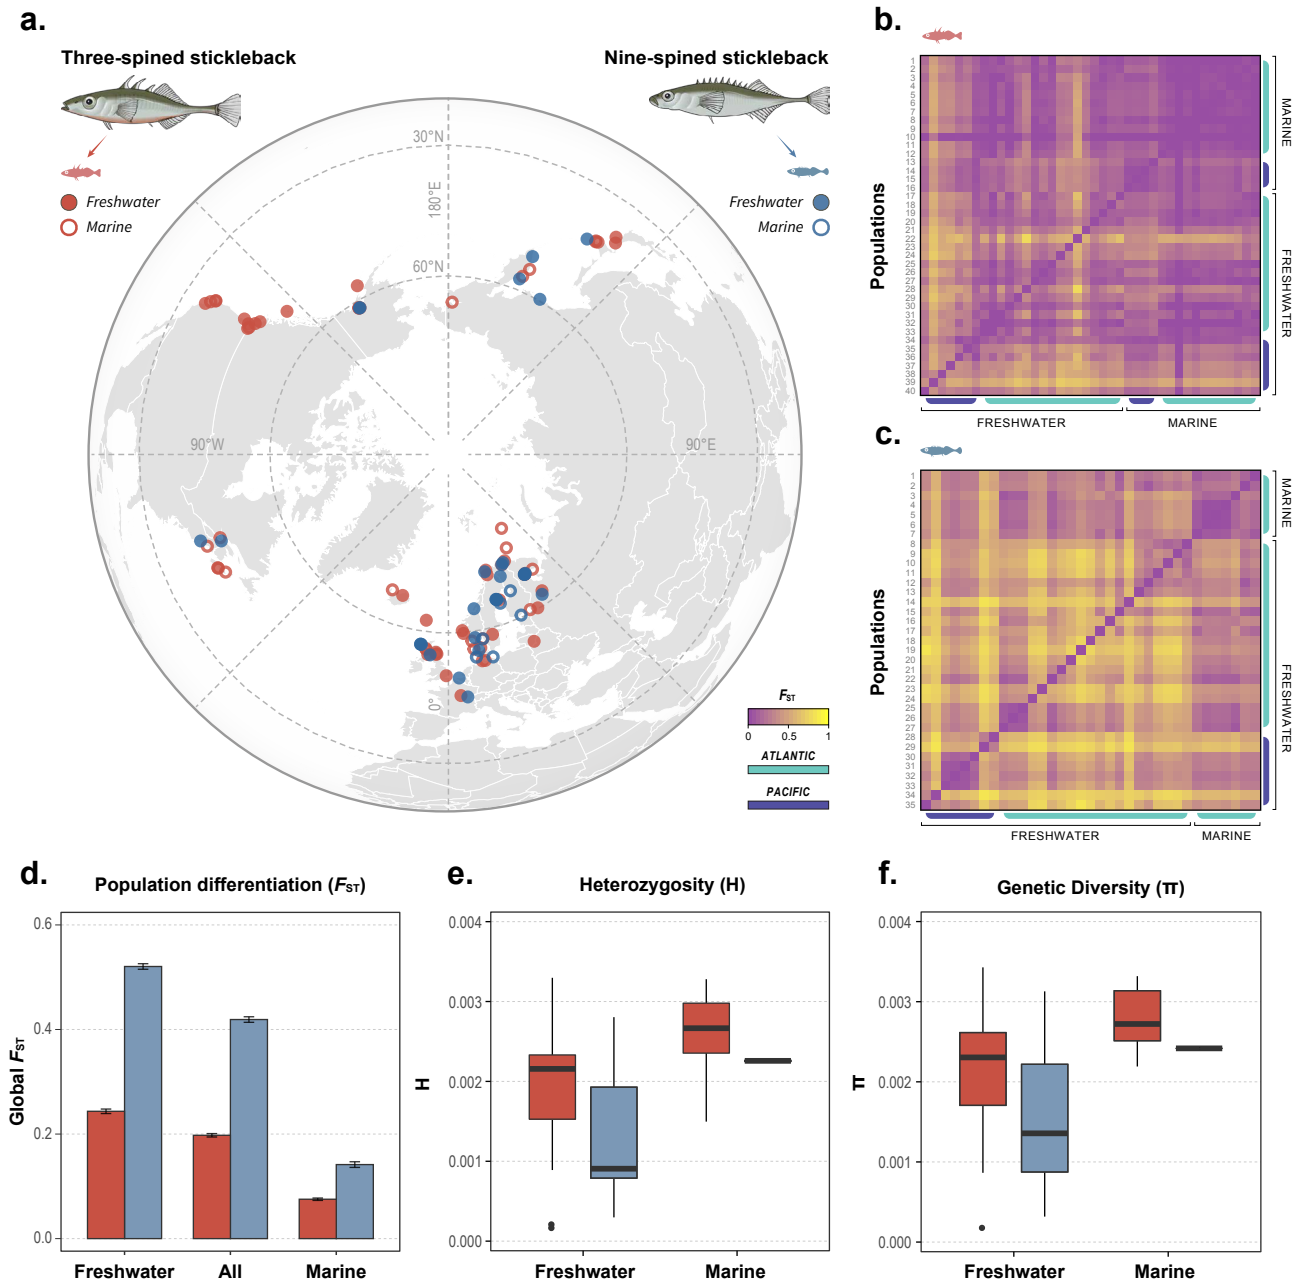

## Figure 2

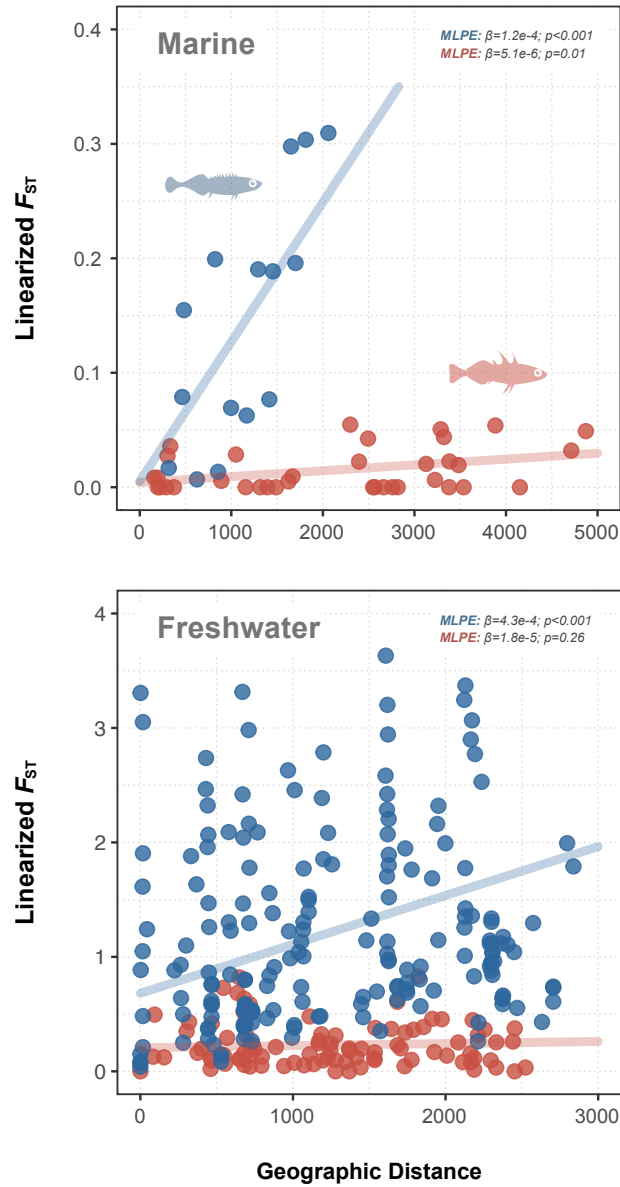

**Figure 3**

- Three-spined stickleback
- Nine-spined stickleback
- Freshwater samples
- Marine samples

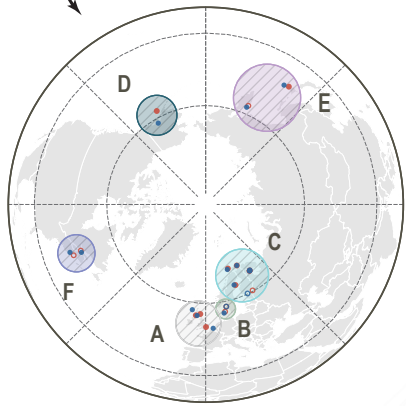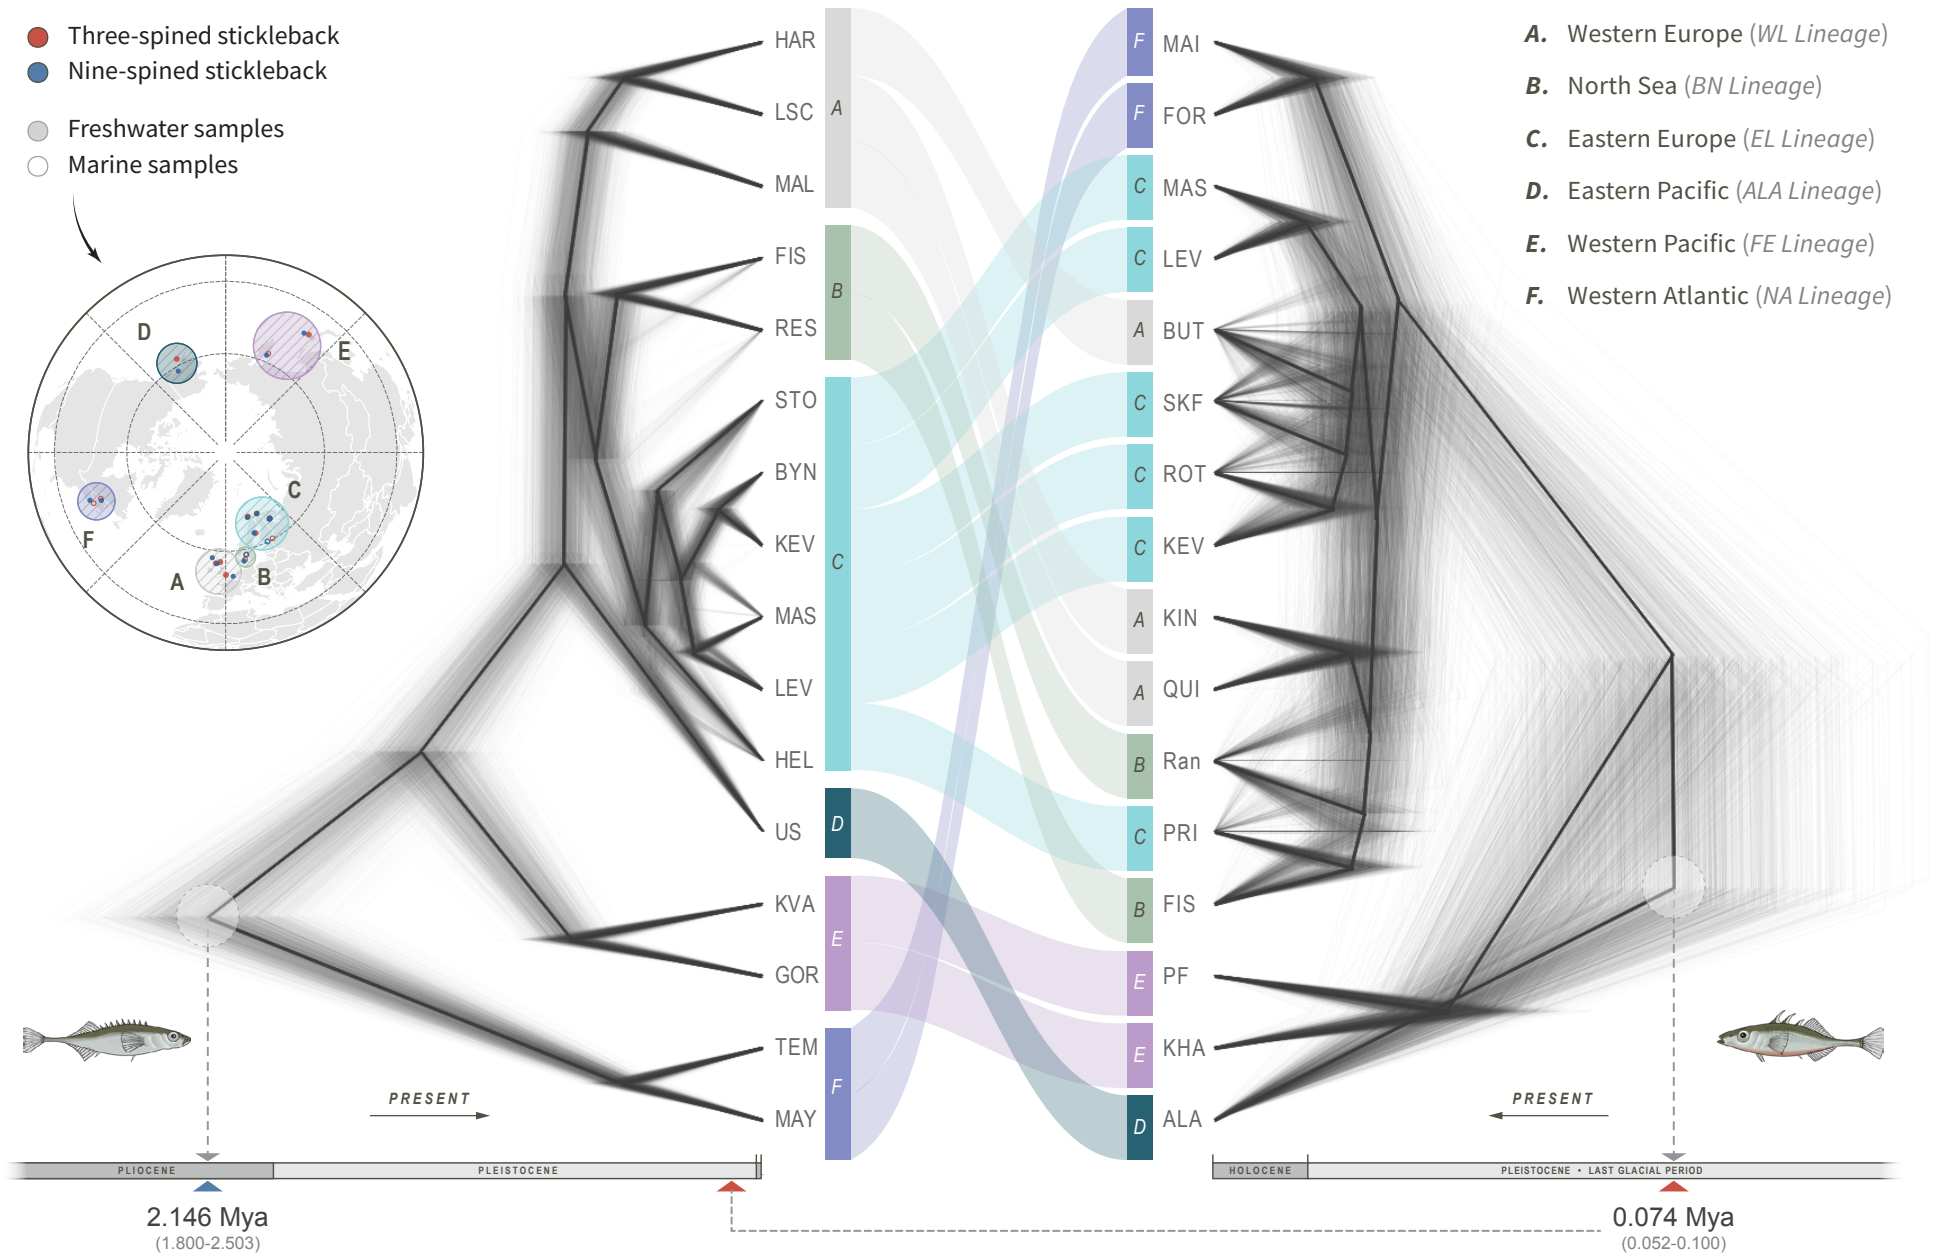

## Figure 4

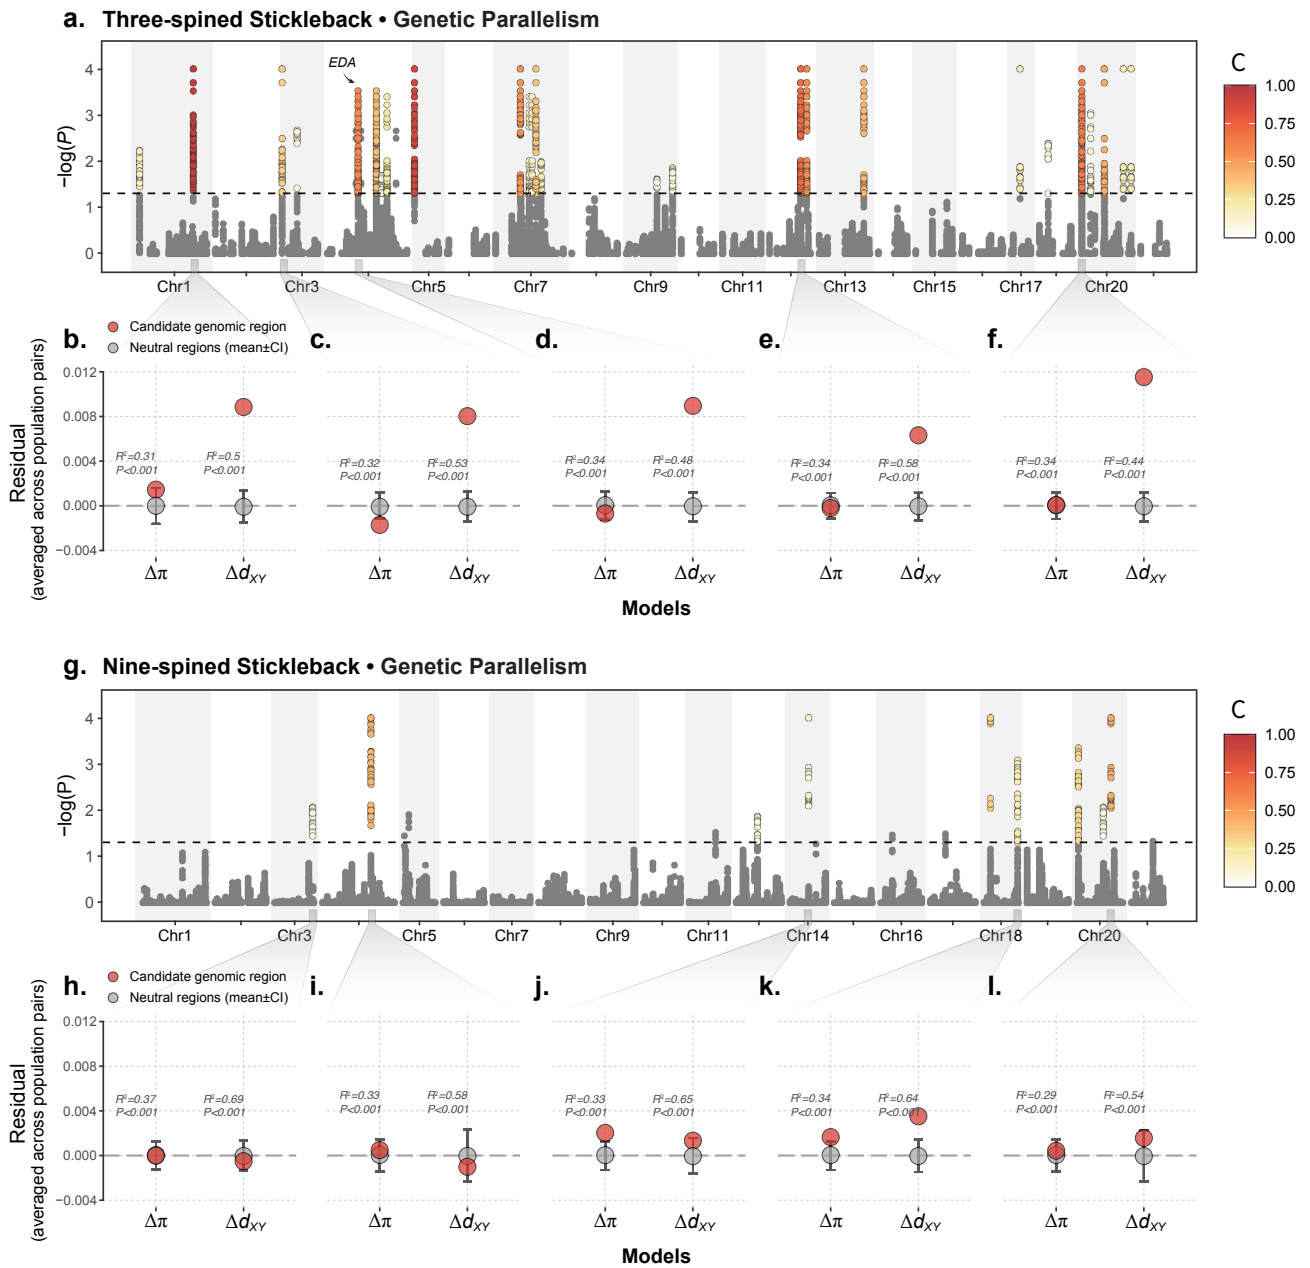

## Figure 5

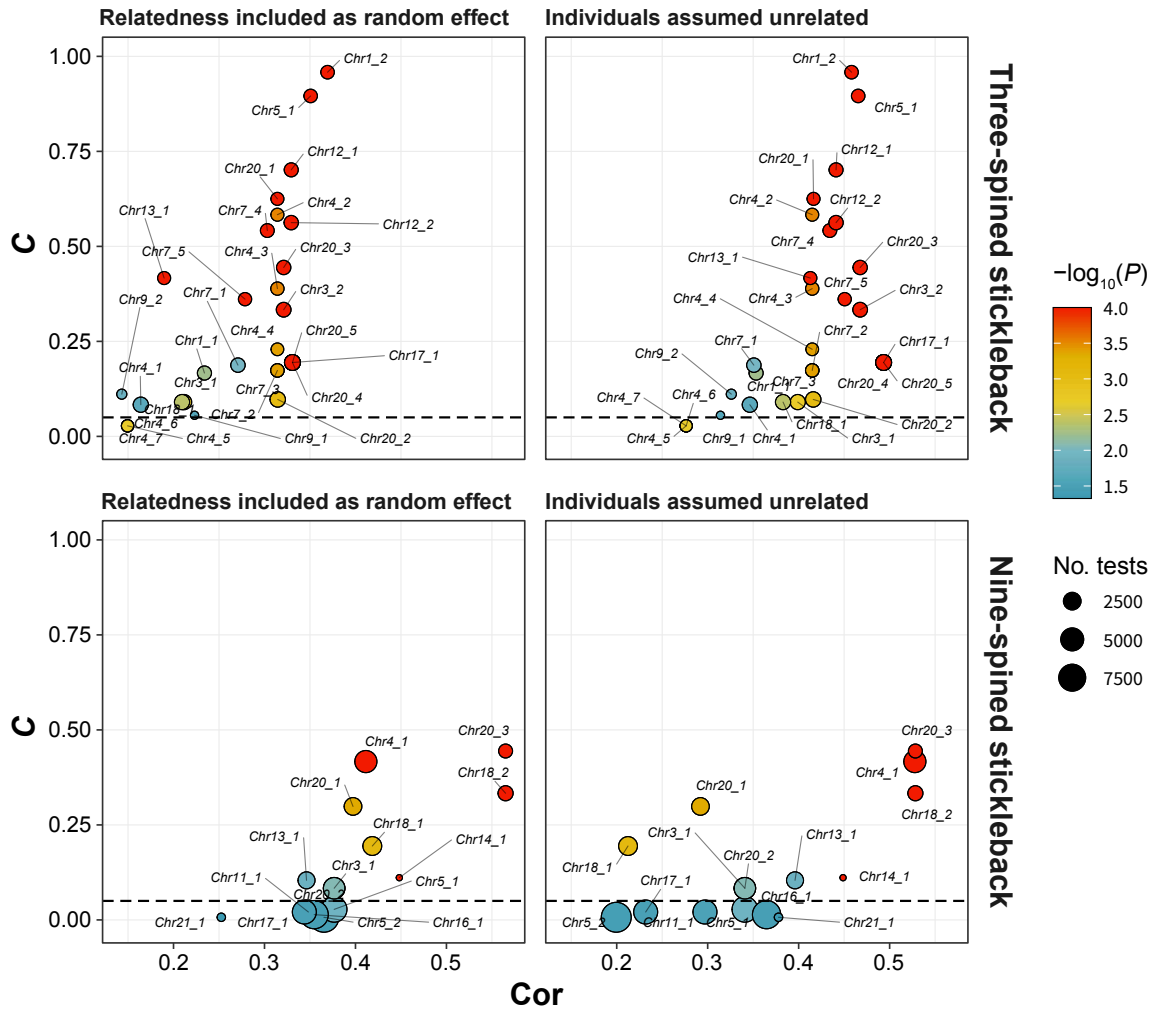

Figure 6

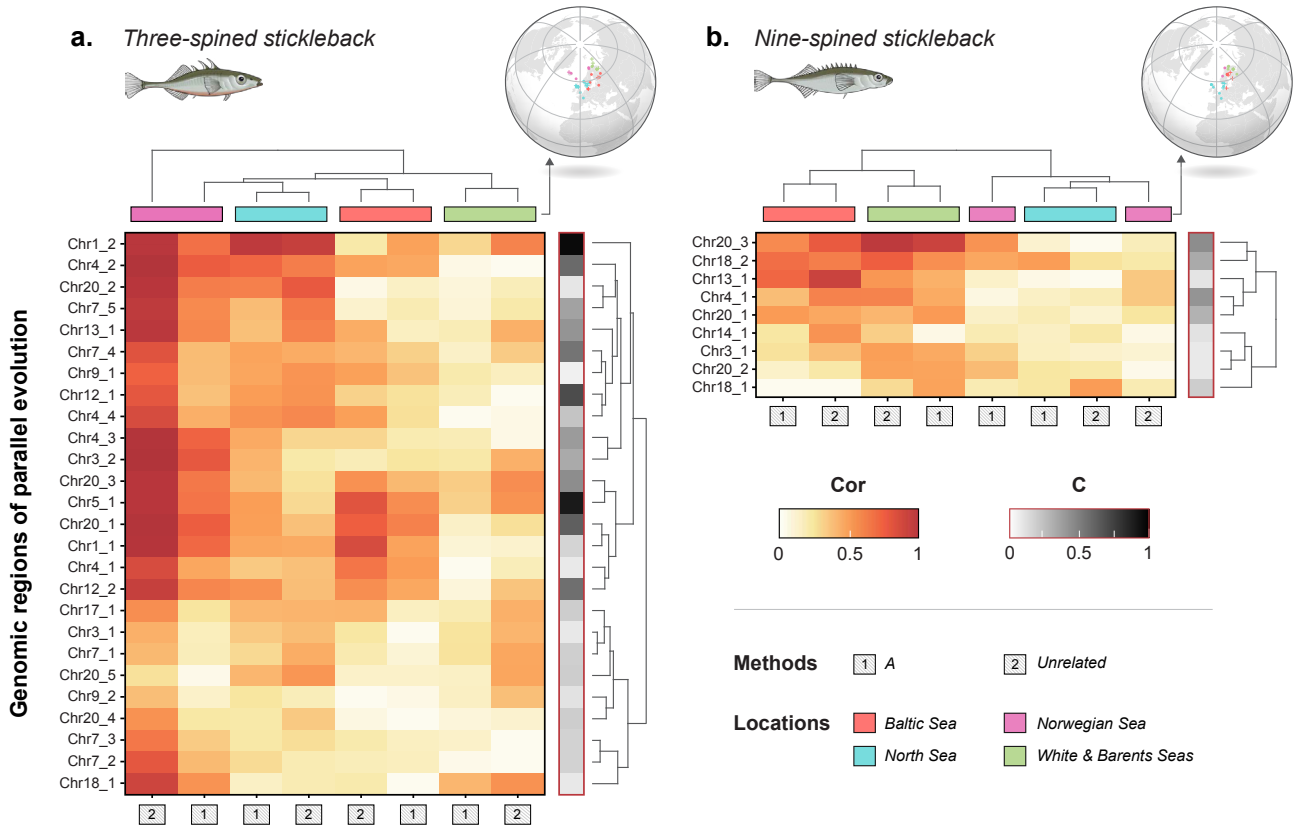

Source: http://biorxiv.org/content/10.1101/2021.01.26.428263v1.full.pdf
